# Supplementary material for: Isolation and Structure Determination of New Pyrones from Dictyostelium spp. Cellular Slime Molds Coincubated with Pseudomonas spp
Source: MDPI journal article supplement (doi:10.3390/molecules29092143), 2024-05-05
Supplement: s1 [file s1]

## Supporting Information

### **Isolation and Structure Determination of New Pyrones from *Dictyostelium* spp. Cellular Slime Molds Coincubated with *Pseudomonas* spp.**

Takehiro Nishimura, Takuya Murotani, Hitomi Sasaki, Yoshinori Uekusa, Hiromi Eguchi, Yuzuru Kubohara, and Haruhisa Kikuchi

#### **Table of contents**

|                                                                                                                   | page |
|-------------------------------------------------------------------------------------------------------------------|------|
| <sup>1</sup> H NMR spectrum (CDCl <sub>3</sub> , 600 MHz) for clavapyrone ( <b>1</b> ) (Figure S1)                | S2   |
| <sup>13</sup> C NMR and DEPT spectrum (CDCl <sub>3</sub> , 150 MHz) for clavapyrone ( <b>1</b> ) (Figure S2)      | S3   |
| DQF-COSY spectrum (CDCl <sub>3</sub> , 600 MHz) for clavapyrone ( <b>1</b> ) (Figure S3)                          | S4   |
| HMBC spectrum (CDCl <sub>3</sub> , 600 MHz) for clavapyrone ( <b>1</b> ) (Figure S4)                              | S5   |
| HMBC spectrum (CDCl <sub>3</sub> , 600 MHz) for clavapyrone ( <b>1</b> ) (Figure S5)                              | S6   |
| <sup>1</sup> H NMR spectrum (CDCl <sub>3</sub> , 600 MHz) for intermediopyrone ( <b>2</b> ) (Figure S6)           | S7   |
| <sup>13</sup> C NMR and DEPT spectrum (CDCl <sub>3</sub> , 150 MHz) for intermediopyrone ( <b>2</b> ) (Figure S7) | S8   |
| DQF-COSY spectrum (CDCl <sub>3</sub> , 600 MHz) for intermediopyrone ( <b>2</b> ) (Figure S8)                     | S9   |
| HMBC spectrum (CDCl <sub>3</sub> , 600 MHz) for intermediopyrone ( <b>2</b> ) (Figure S9)                         | S10  |
| HMBC spectrum (CDCl <sub>3</sub> , 600 MHz) for intermediopyrone ( <b>2</b> ) (Figure S10)                        | S11  |
| Experimental and theoretical ECD spectrum for intermediopyrone ( <b>2</b> ) (Figure S11)                          | S12  |
| Structures and specific rotation data of isocoumarines (Table S1)                                                 | S12  |
| <sup>1</sup> H NMR spectrum (CDCl <sub>3</sub> , 600 MHz) for magnumiol ( <b>3</b> ) (Figure S12)                 | S13  |
| <sup>13</sup> C NMR and DEPT spectrum (CDCl <sub>3</sub> , 150 MHz) for magnumiol ( <b>3</b> ) (Figure S13)       | S14  |
| DQF-COSY spectrum (CDCl <sub>3</sub> , 600 MHz) for magnumiol ( <b>3</b> ) (Figure S14)                           | S15  |
| HMBC spectrum (CDCl <sub>3</sub> , 600 MHz) for magnumiol ( <b>3</b> ) (Figure S15)                               | S16  |
| HMBC spectrum (CDCl <sub>3</sub> , 600 MHz) for magnumiol ( <b>3</b> ) (Figure S16)                               | S17  |
| HRMS spectra for clavapyrone ( <b>1</b> ) (Figure S17)                                                            | S18  |
| HRMS spectra for intermediopyrone ( <b>2</b> ) (Figure S18)                                                       | S18  |
| HRMS spectra for magnumiol ( <b>3</b> ) (Figure S19)                                                              | S19  |
| Reference                                                                                                         | S20  |

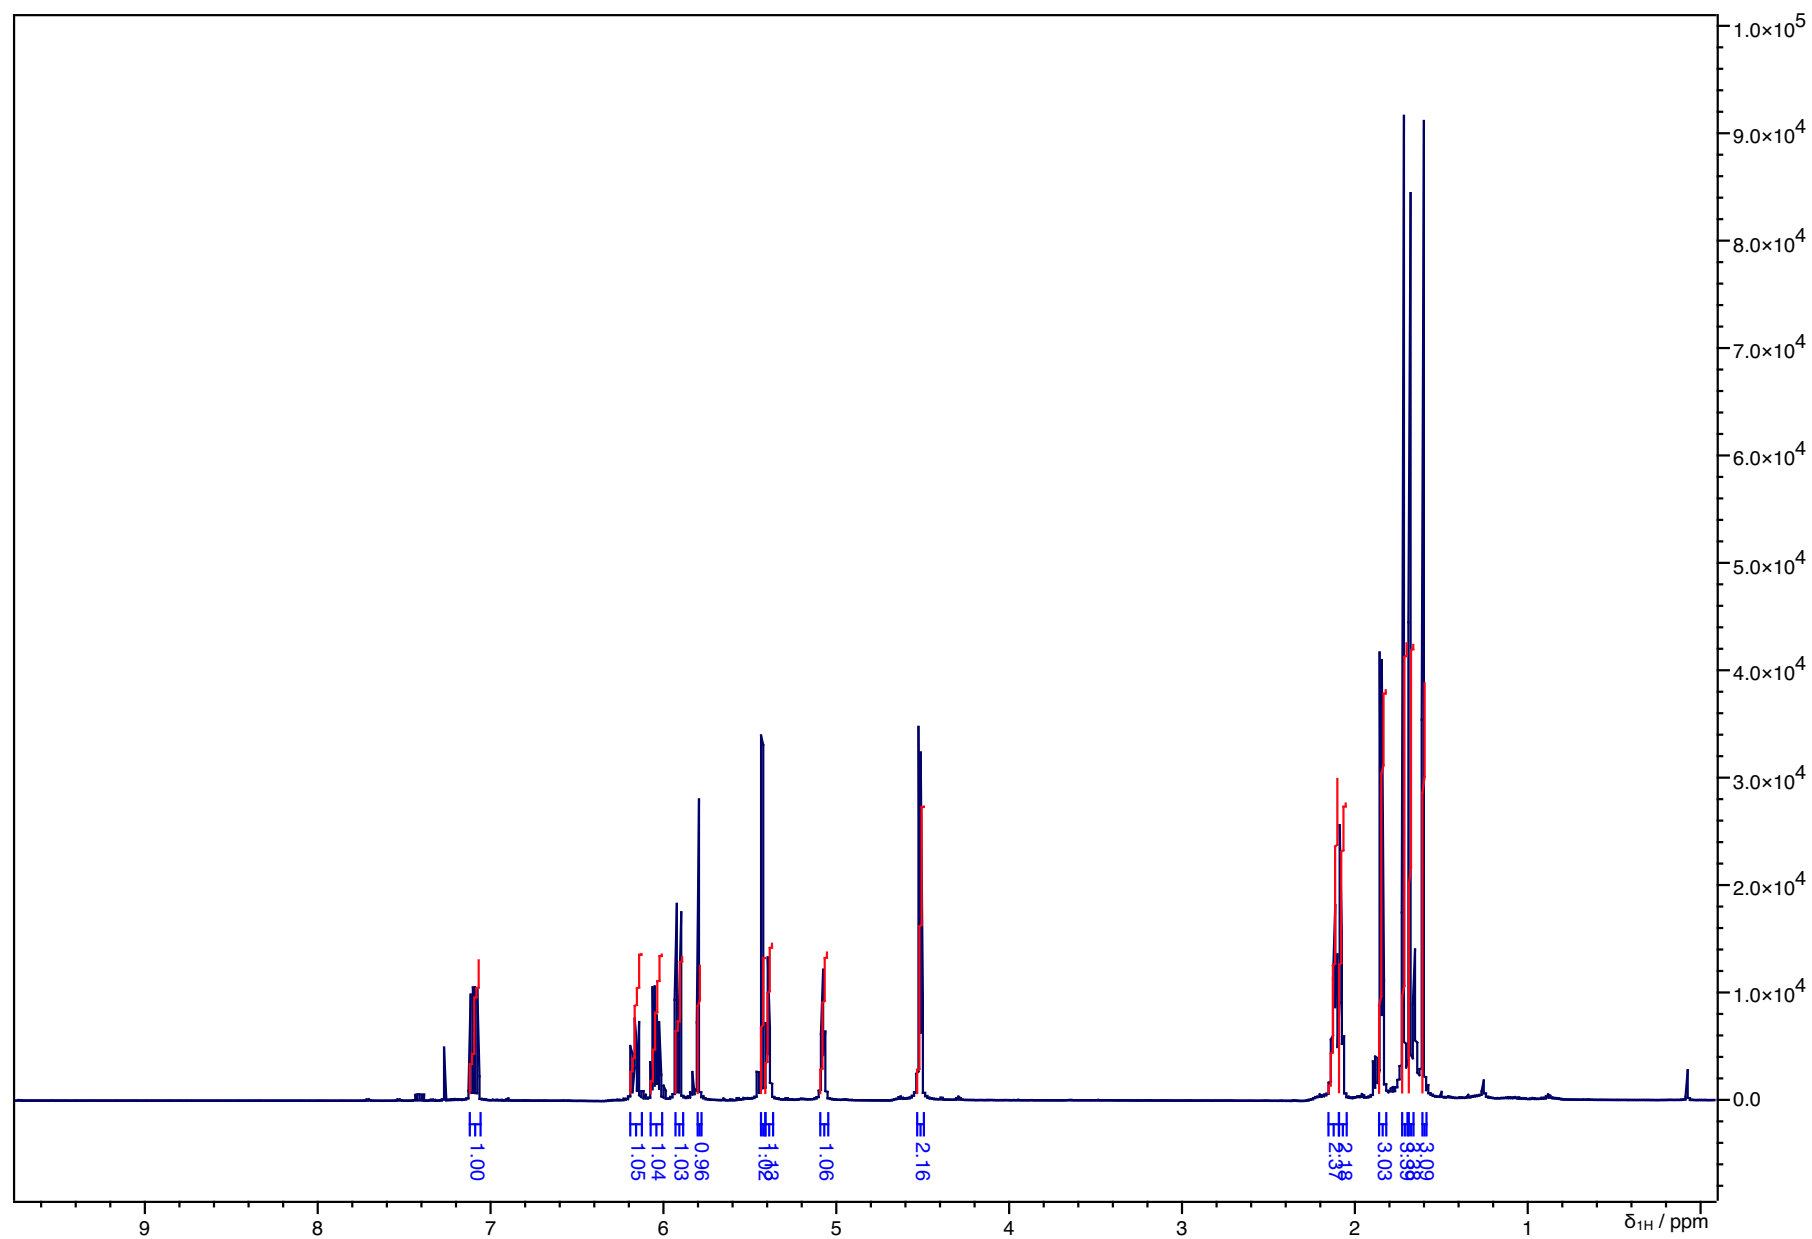

Figure S1.  $^1\text{H}$  NMR spectrum (CDCl<sub>3</sub>, 600 MHz) for **1**.

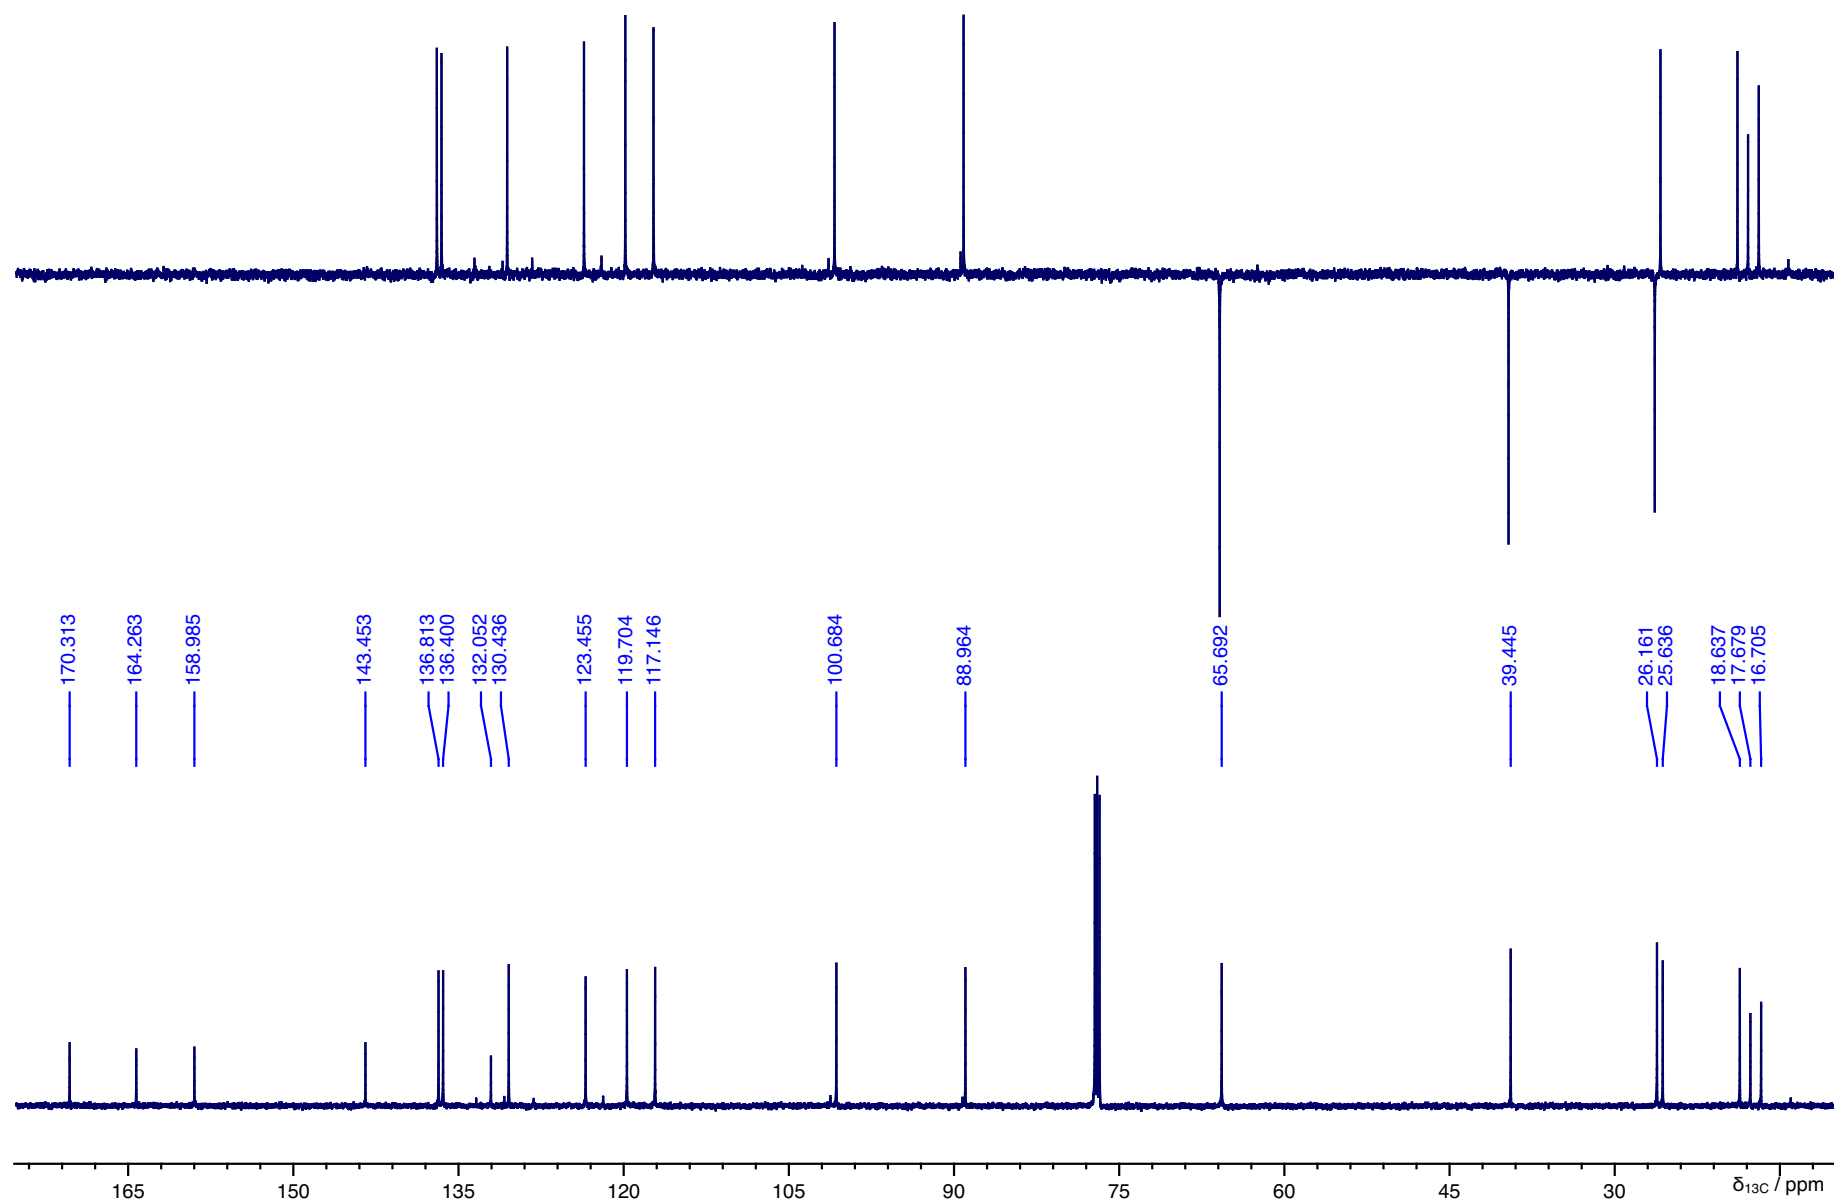

Figure S2. <sup>13</sup>C NMR and DEPT spectra (CDCl<sub>3</sub>, 150 MHz) for **1**.

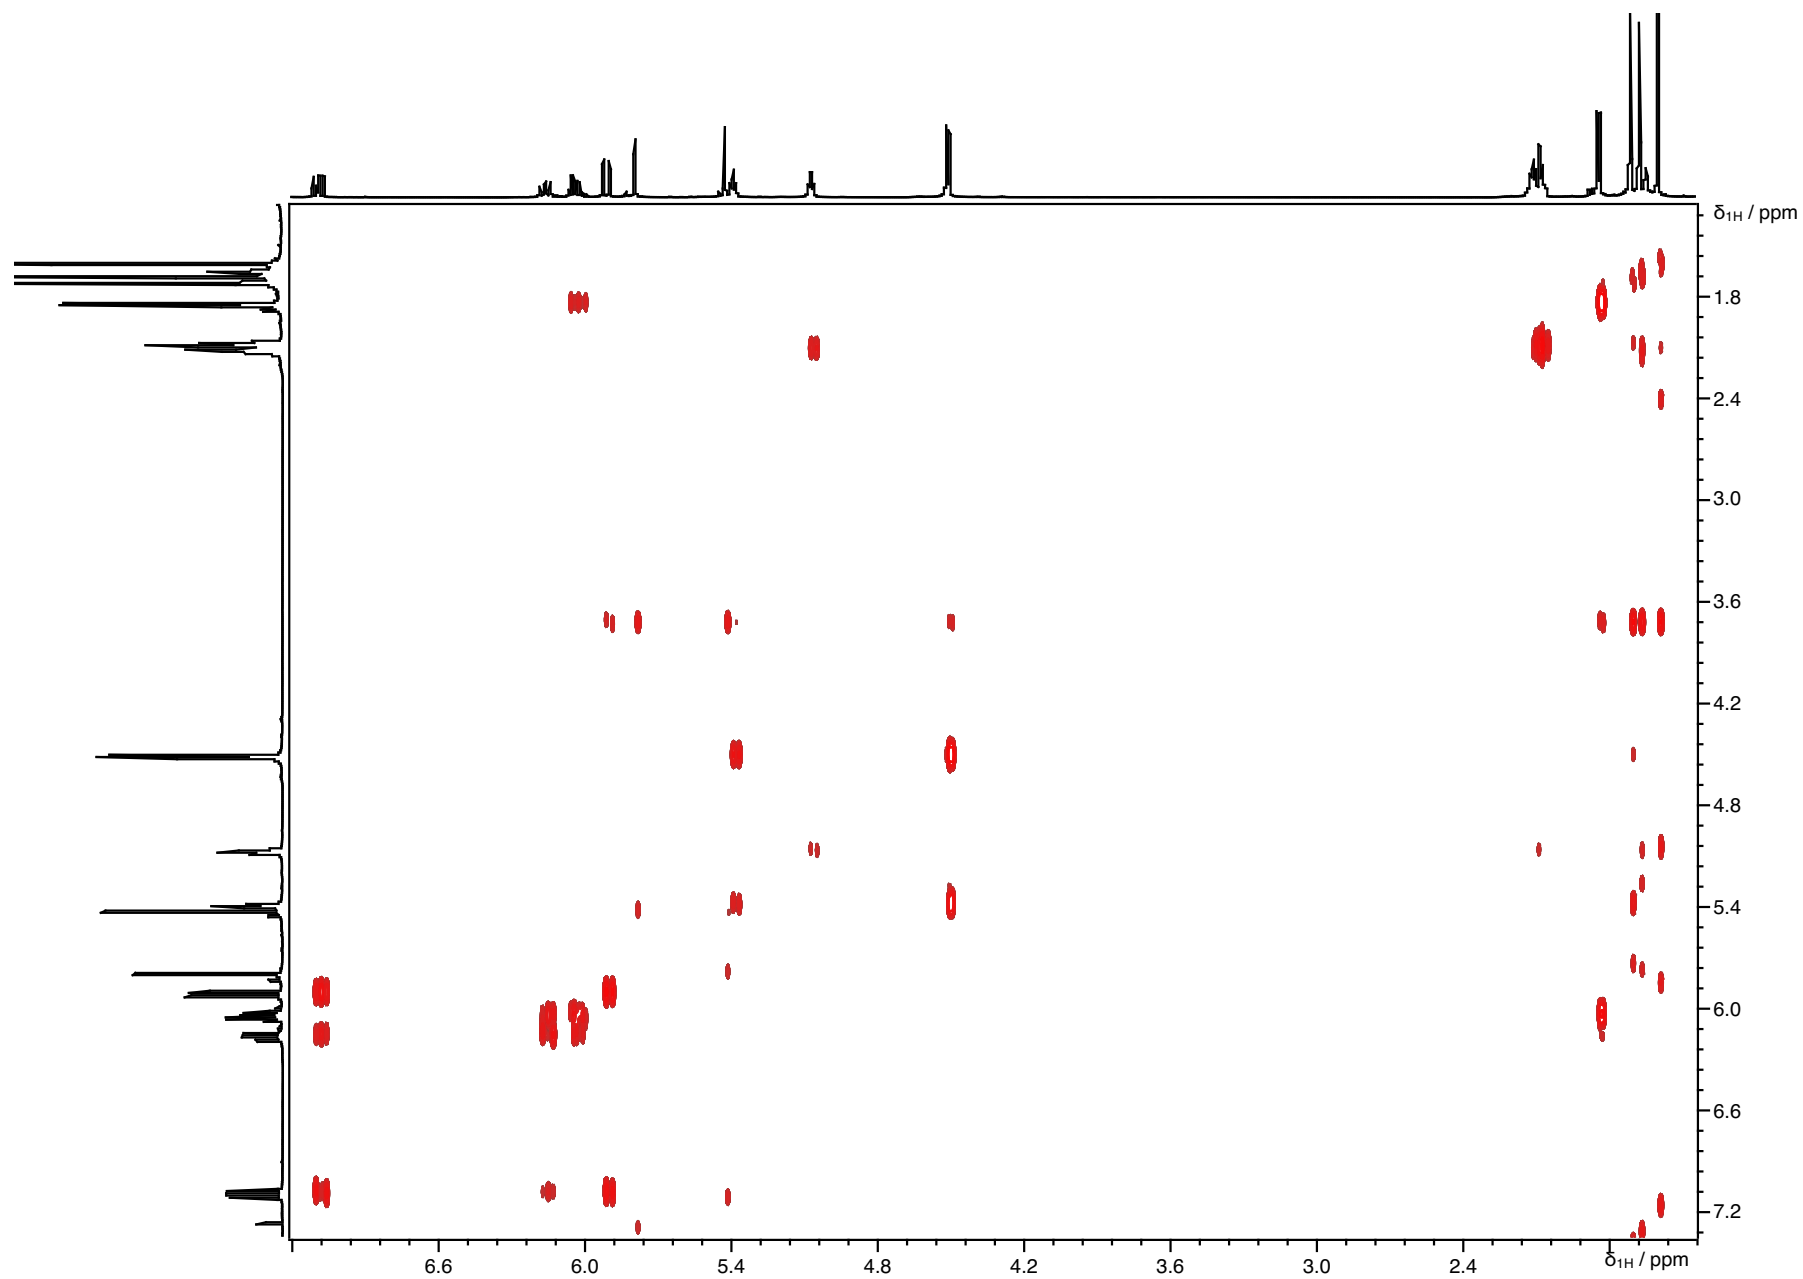

Figure S3. DQF-COSY spectrum (CDCl<sub>3</sub>, 600 MHz) for **1**.



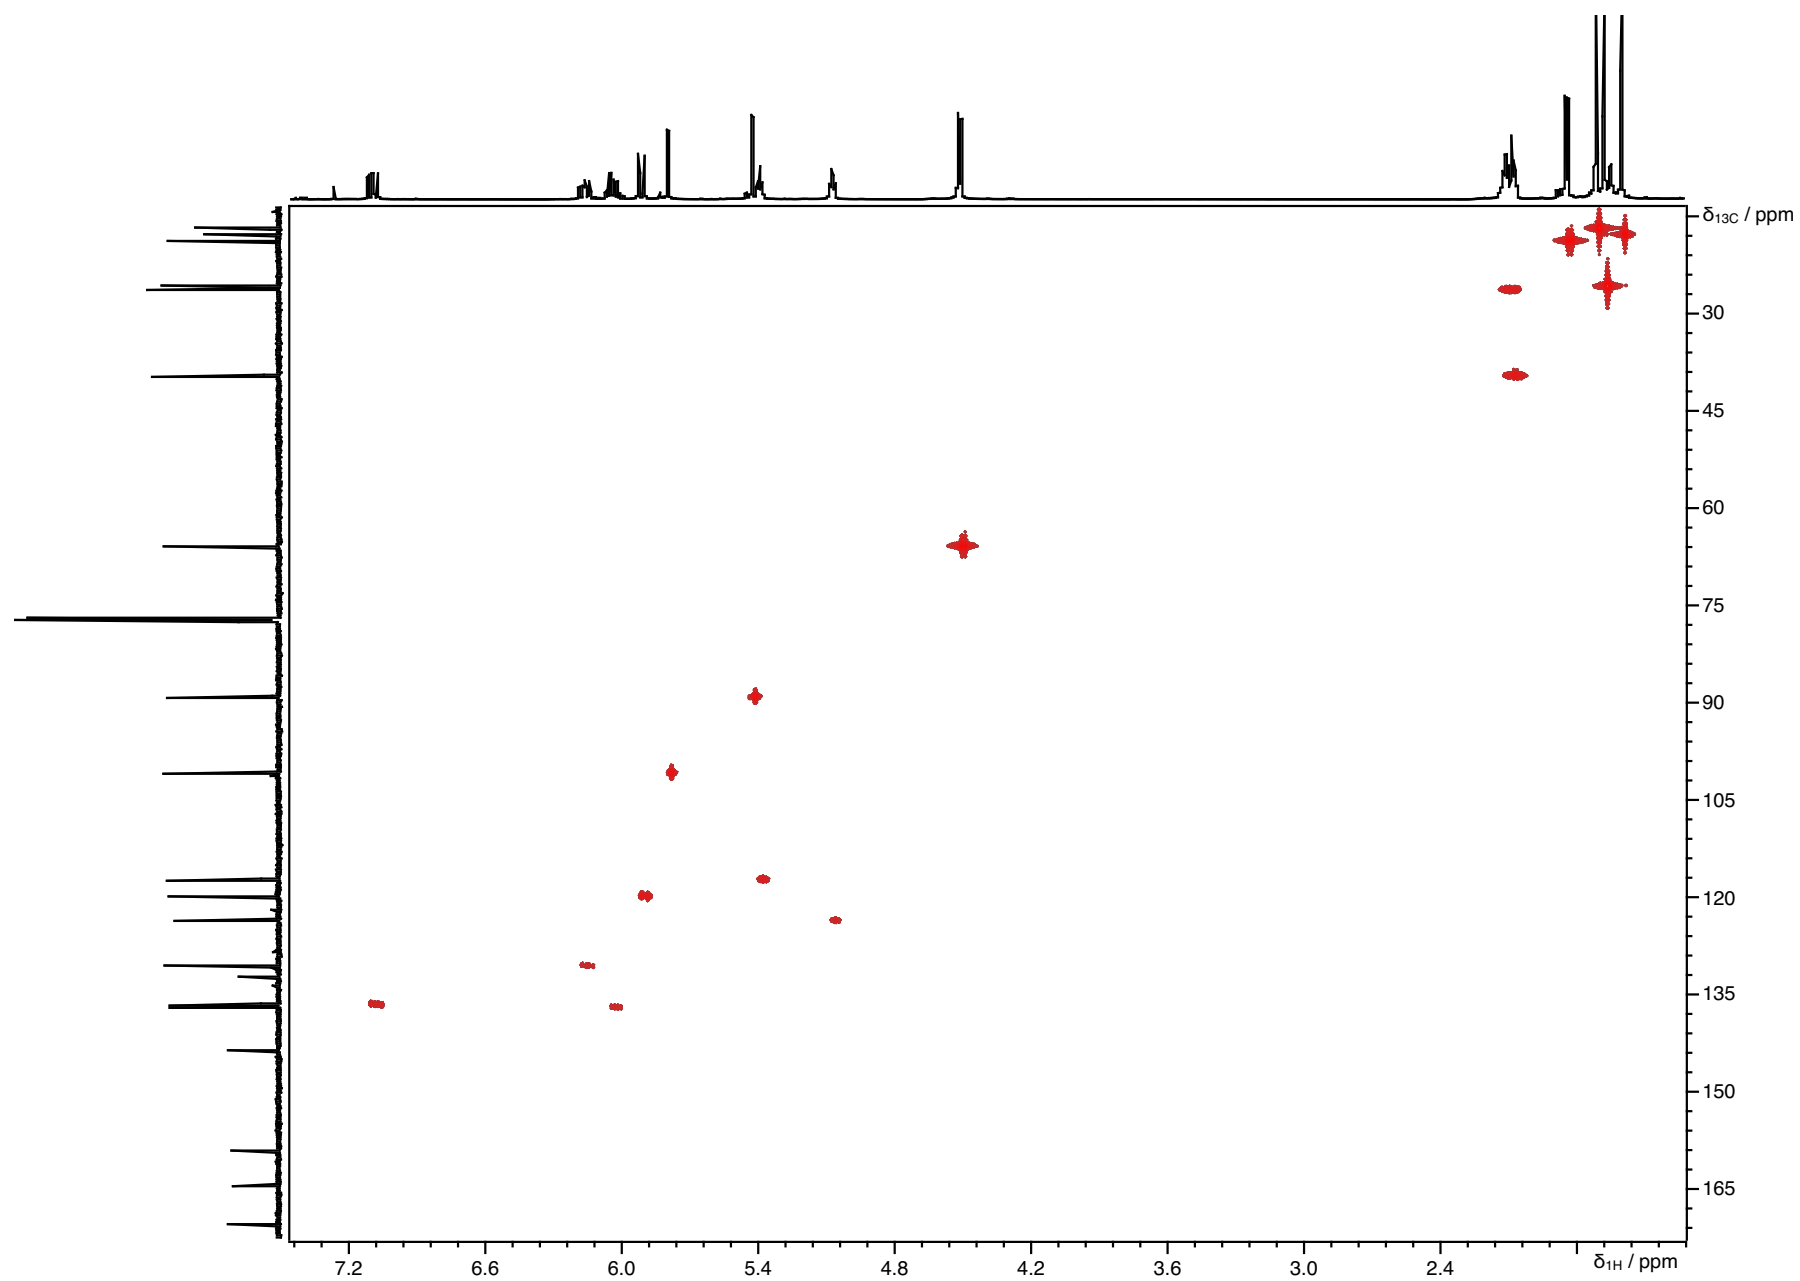

Figure S4. HMQC spectrum (CDCl<sub>3</sub>, 600 MHz) for **1**.

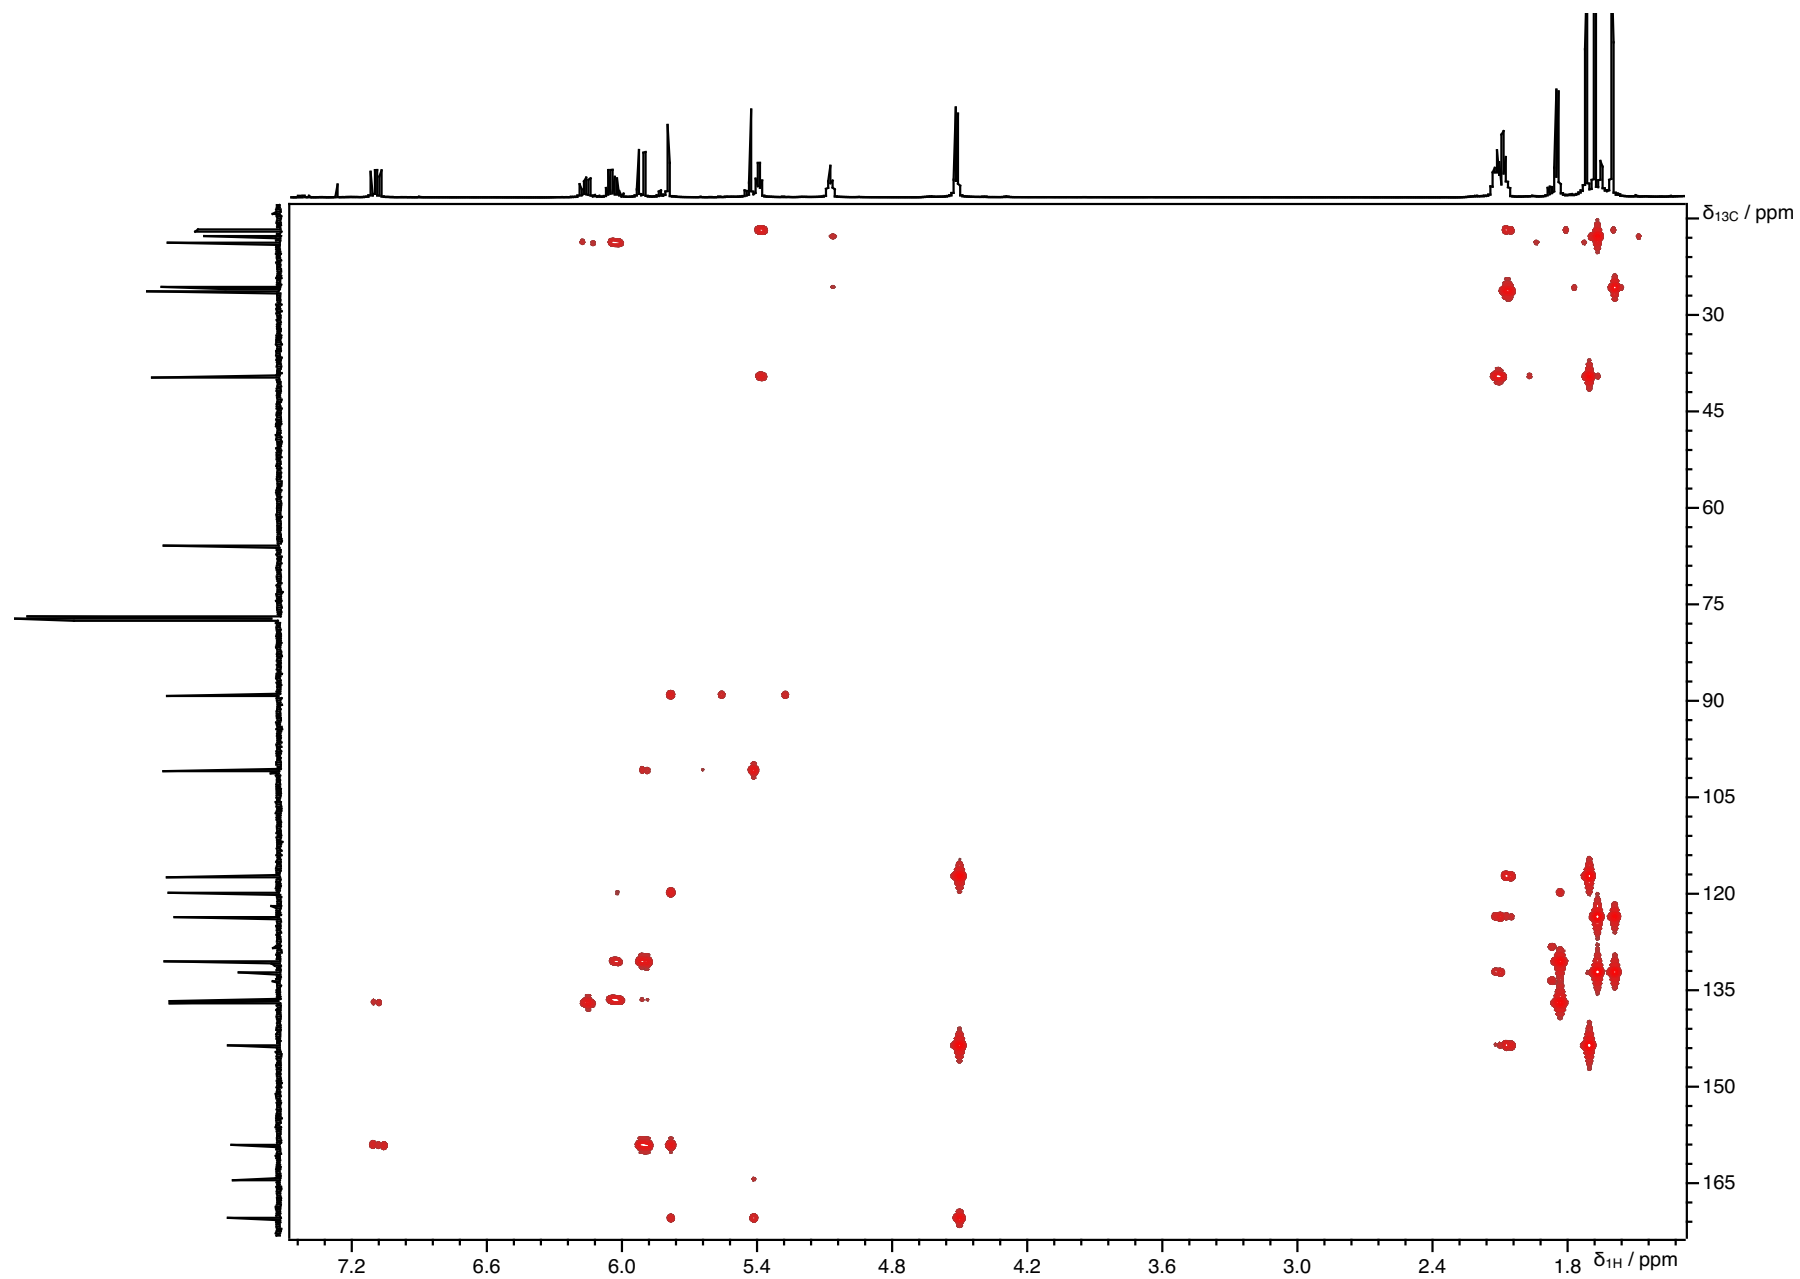

Figure S5. HMBC spectrum (CDCl<sub>3</sub>, 600 MHz) for **1**.

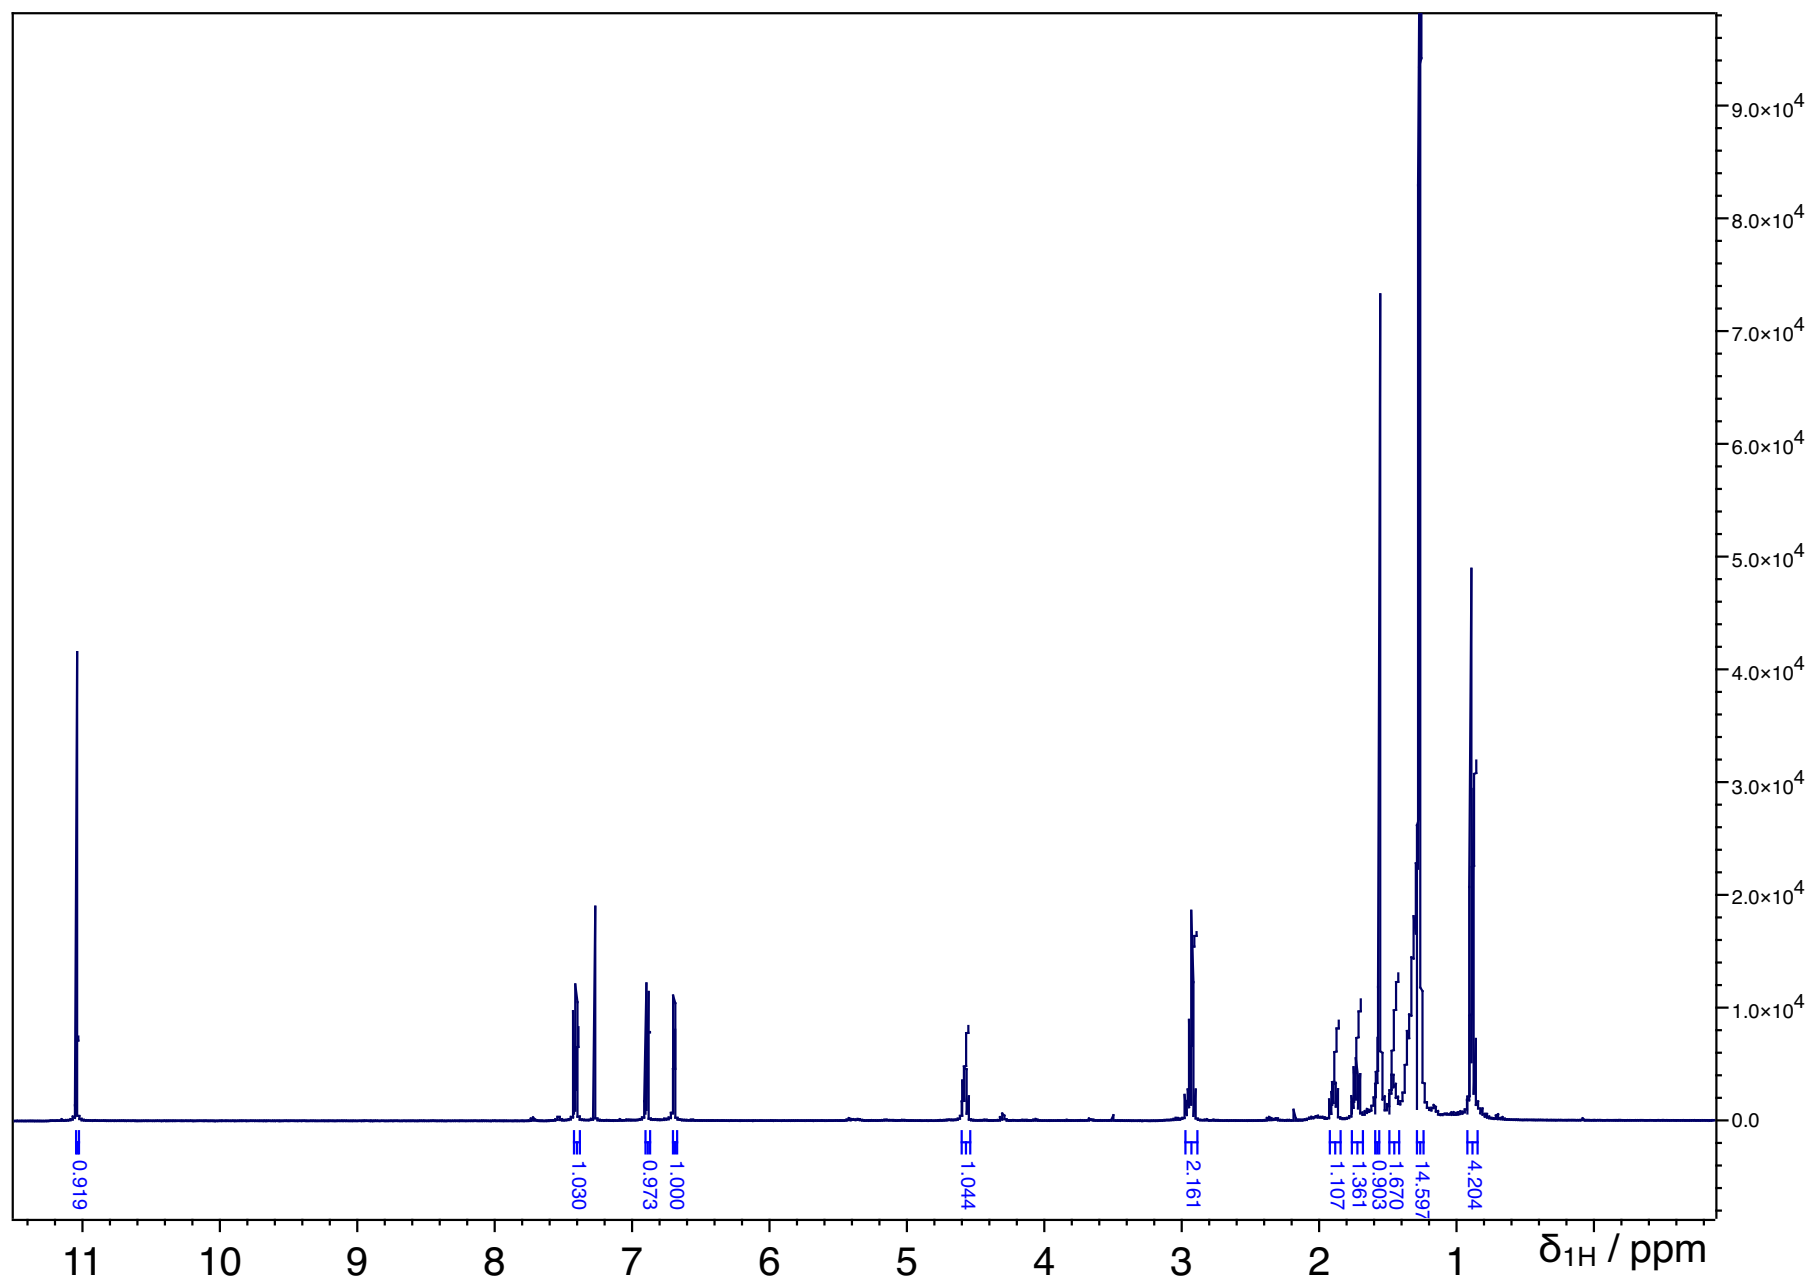

Figure S6. <sup>1</sup>H NMR spectrum (CDCl<sub>3</sub>, 600 MHz) for **2**.

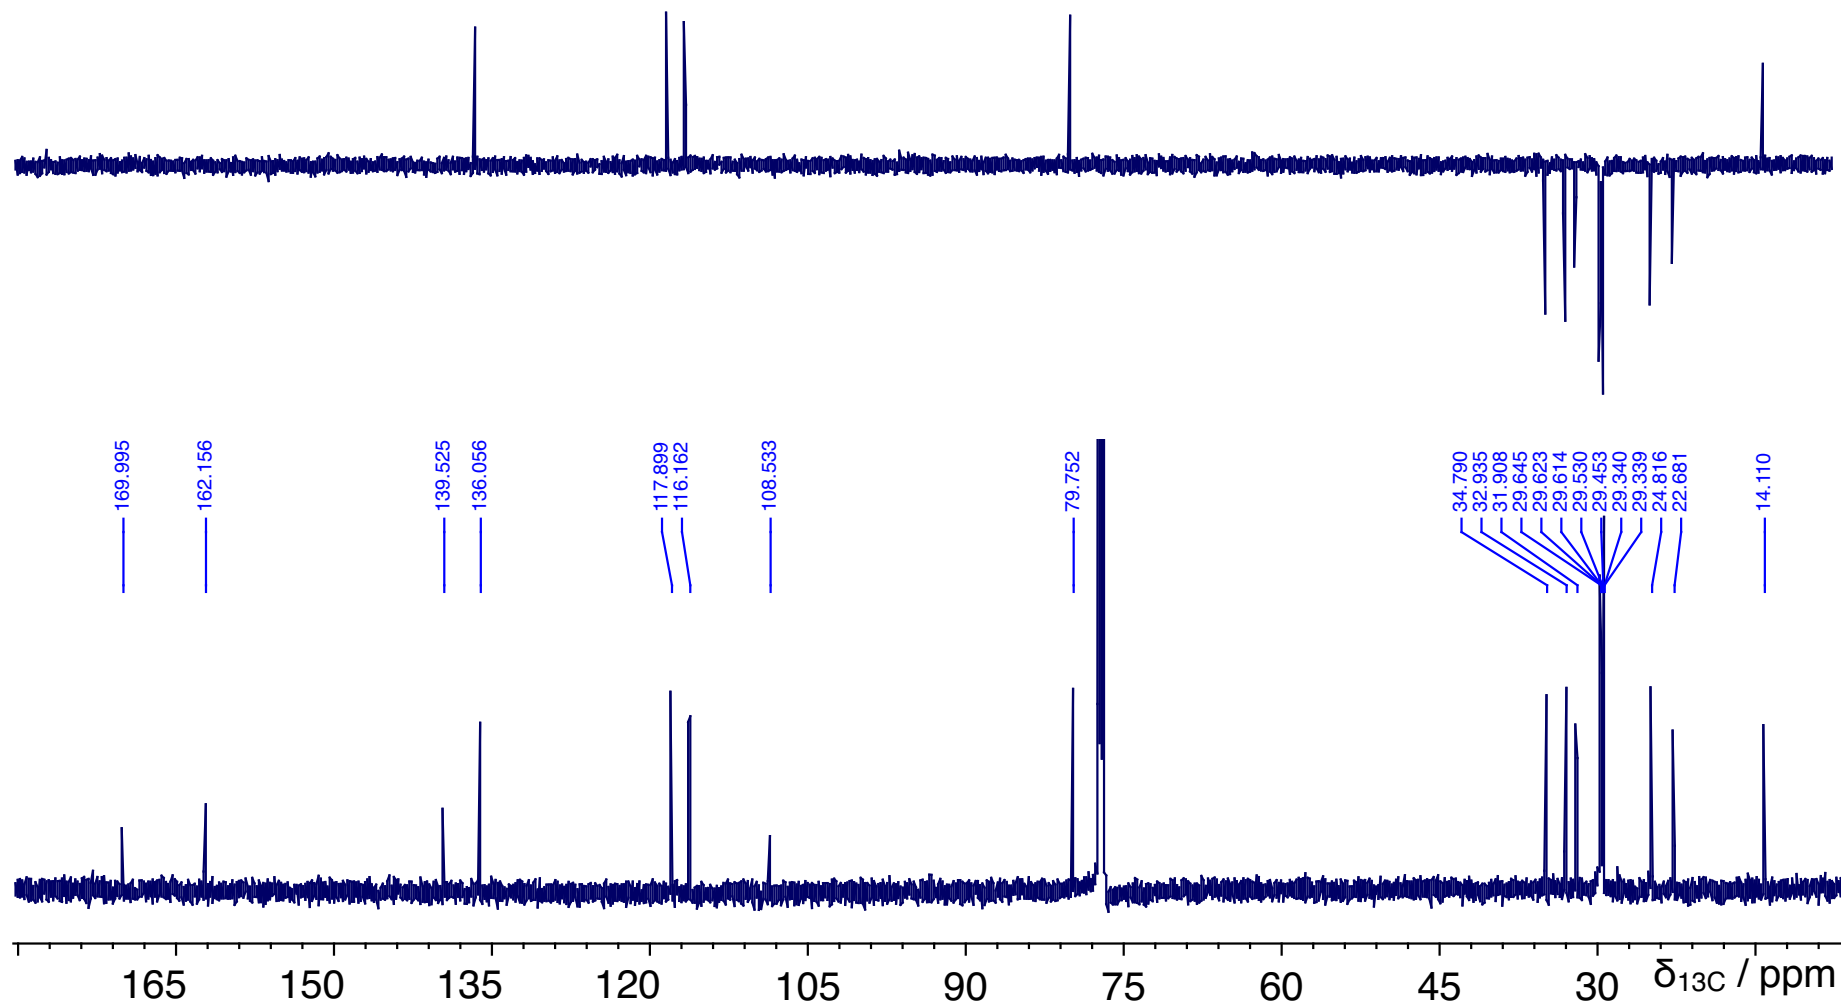

Figure S7.  $^{13}\text{C}$  NMR and DEPT spectra ( $\text{CDCl}_3$ , 150 MHz)

S8

for **2**.

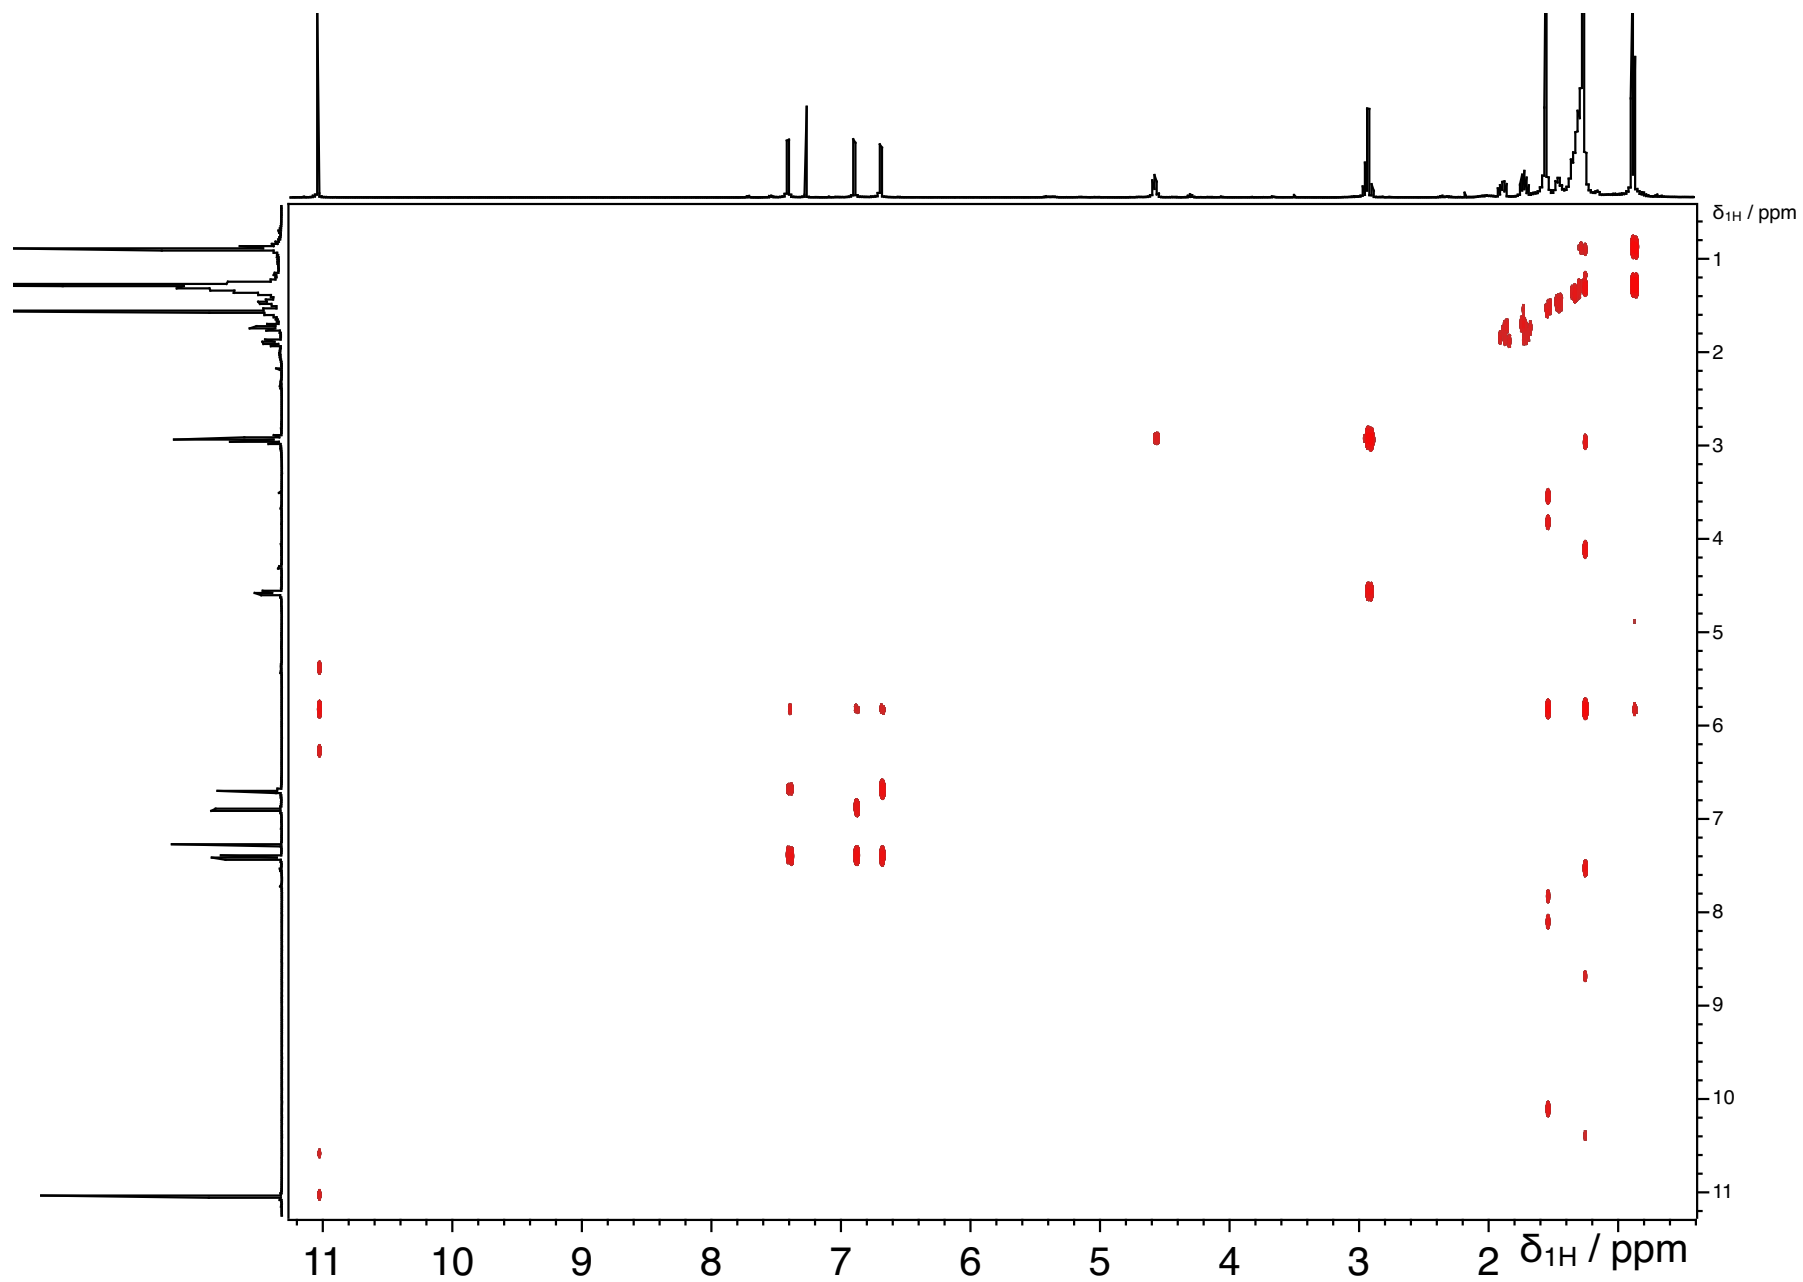

Figure S8. DQF-COSY spectrum ( $CDCl_3$ , 600 MHz) for **2**.

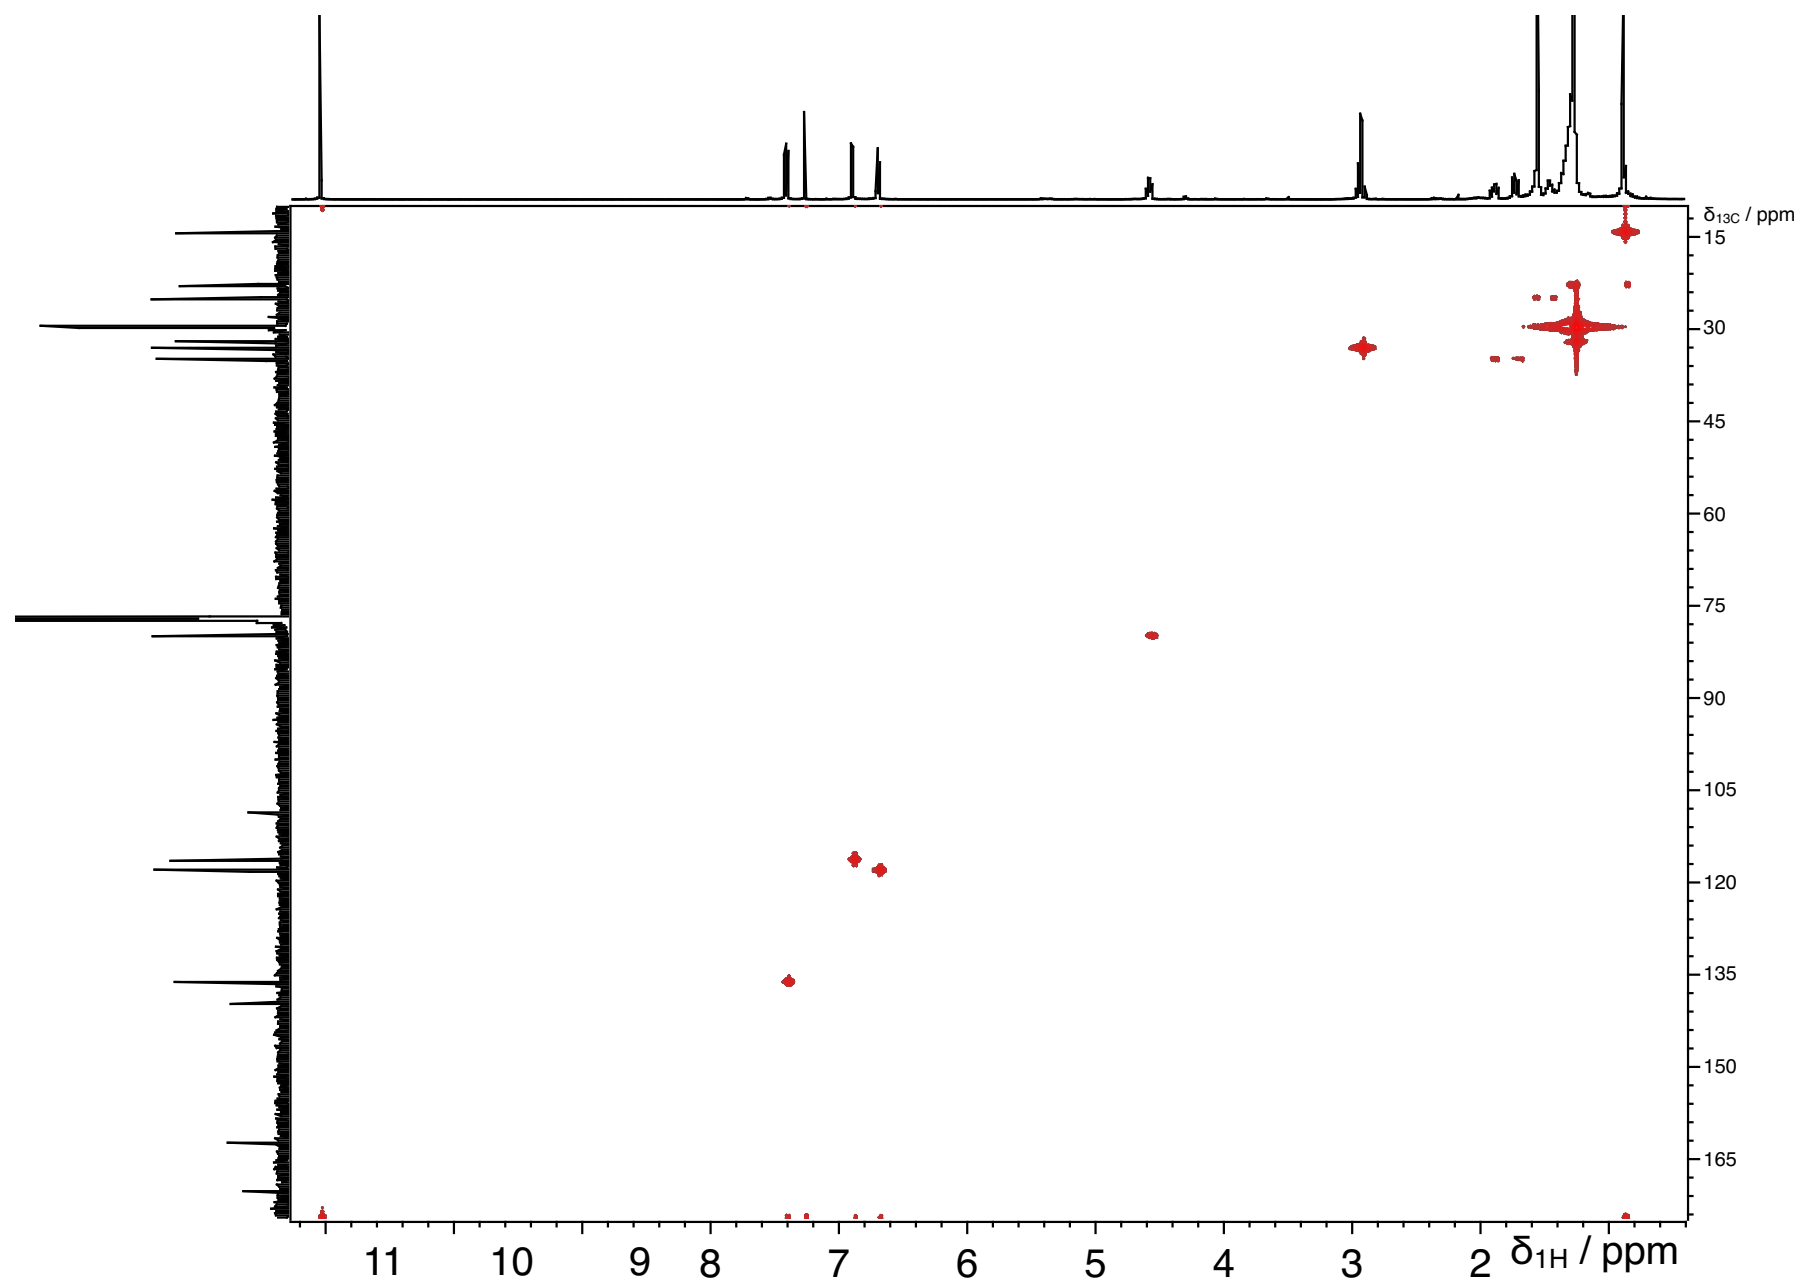

Figure S9. HMQC spectrum (CDCl<sub>3</sub>, 600 MHz)

S10

for **2**.

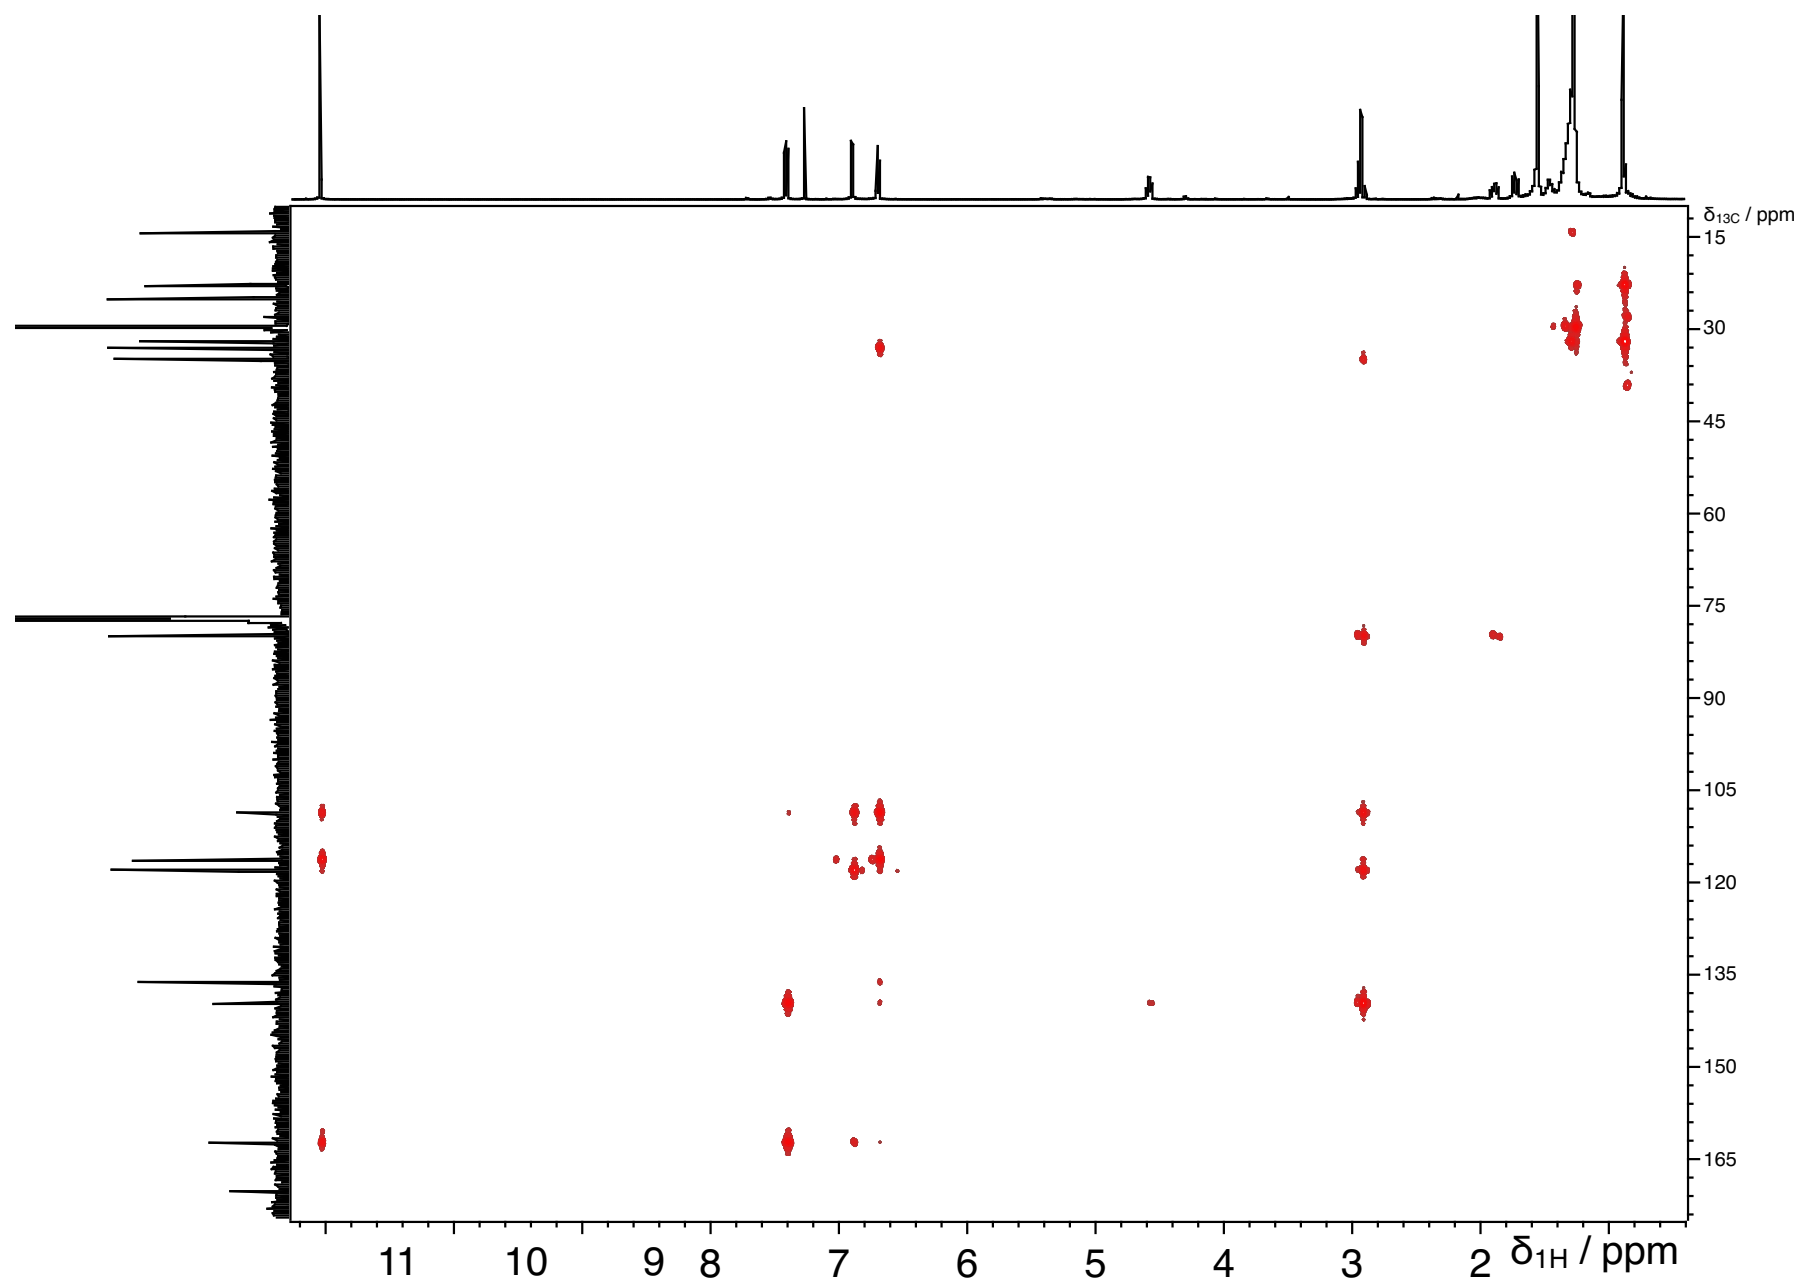

Figure S10. HMBC spectrum (CDCl<sub>3</sub>, 600 MHz)

S11

for 2.

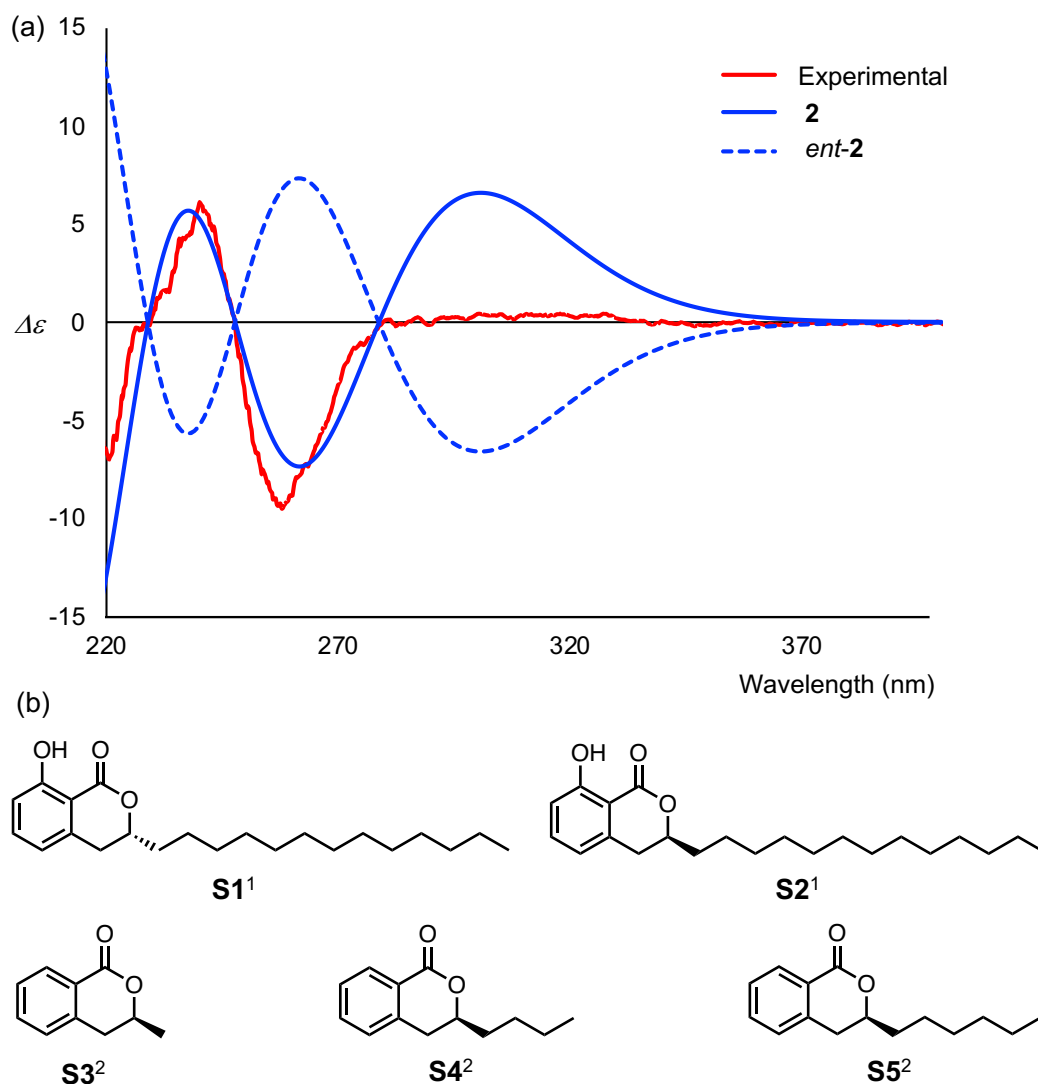

Figure S11. (a) Experimental and theoretical ECD spectra of **2** and *ent-2*. (b) Structures used for comparison of ECD spectra and optical rotations with **2**.

Table S1. Specific rotations of isocoumarin-type compounds.<sup>1,2</sup>

| Compounds | Specific rotation                                              |
|-----------|----------------------------------------------------------------|
| <b>2</b>  | $[\alpha]_{\text{D}}^{26} -20.4$ (c 0.15, CDCl <sub>3</sub> )  |
| <b>S1</b> | $[\alpha]_{\text{D}}^{23} -31$ (c 1.0, CDCl <sub>3</sub> )     |
| <b>S2</b> | $[\alpha]_{\text{D}}^{23} +32$ (c 1.0, CDCl <sub>3</sub> )     |
| <b>S3</b> | $[\alpha]_{\text{D}}^{22} +141.4$ (c 1.30, CDCl <sub>3</sub> ) |
| <b>S4</b> | $[\alpha]_{\text{D}}^{22} +82.9$ (c 1.20, CDCl <sub>3</sub> )  |
| <b>S5</b> | $[\alpha]_{\text{D}}^{22} +68.9$ (c 1.25, CDCl <sub>3</sub> )  |



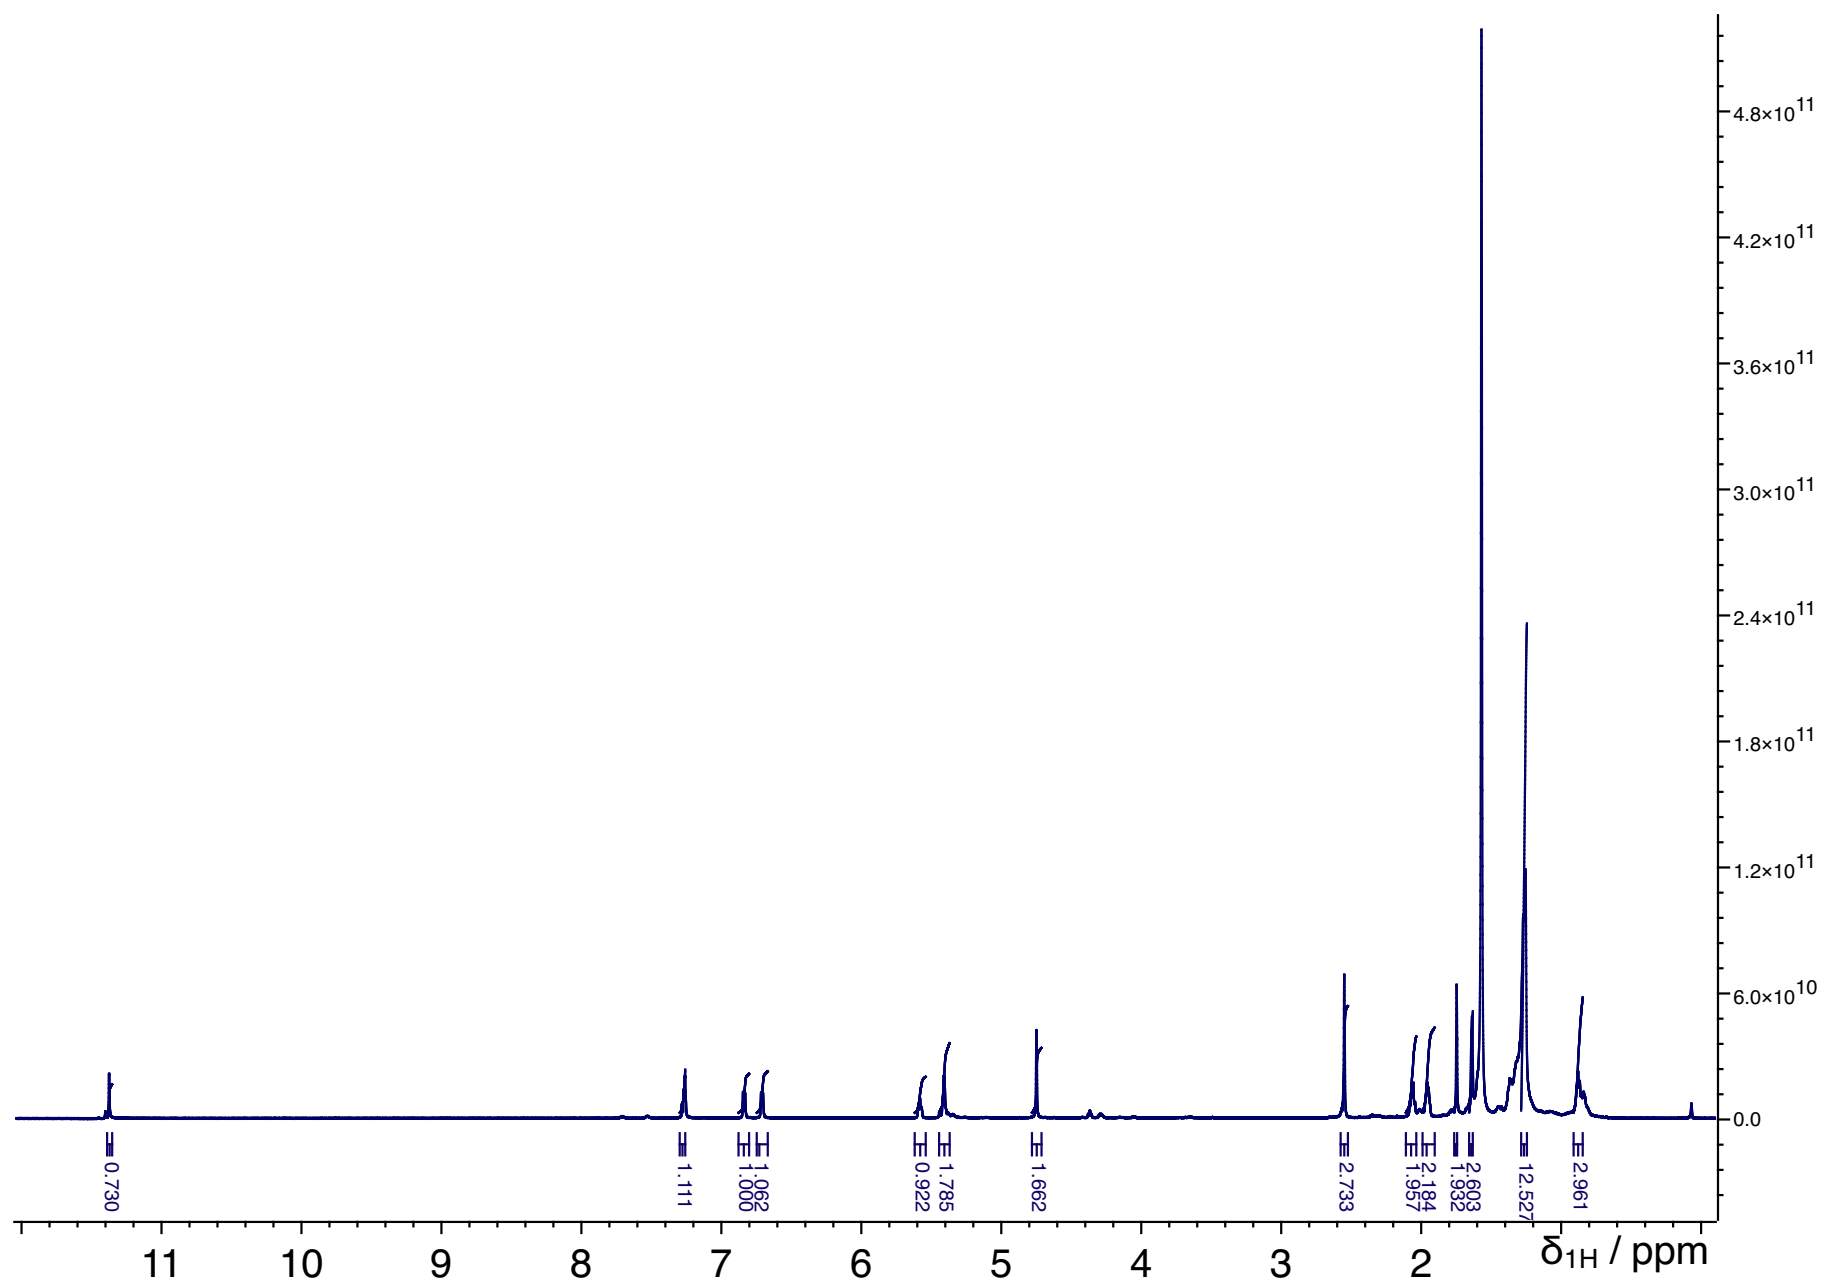

Figure S12.  $^1\text{H}$  NMR spectrum (CDCl<sub>3</sub>, 600 MHz) for **3**.

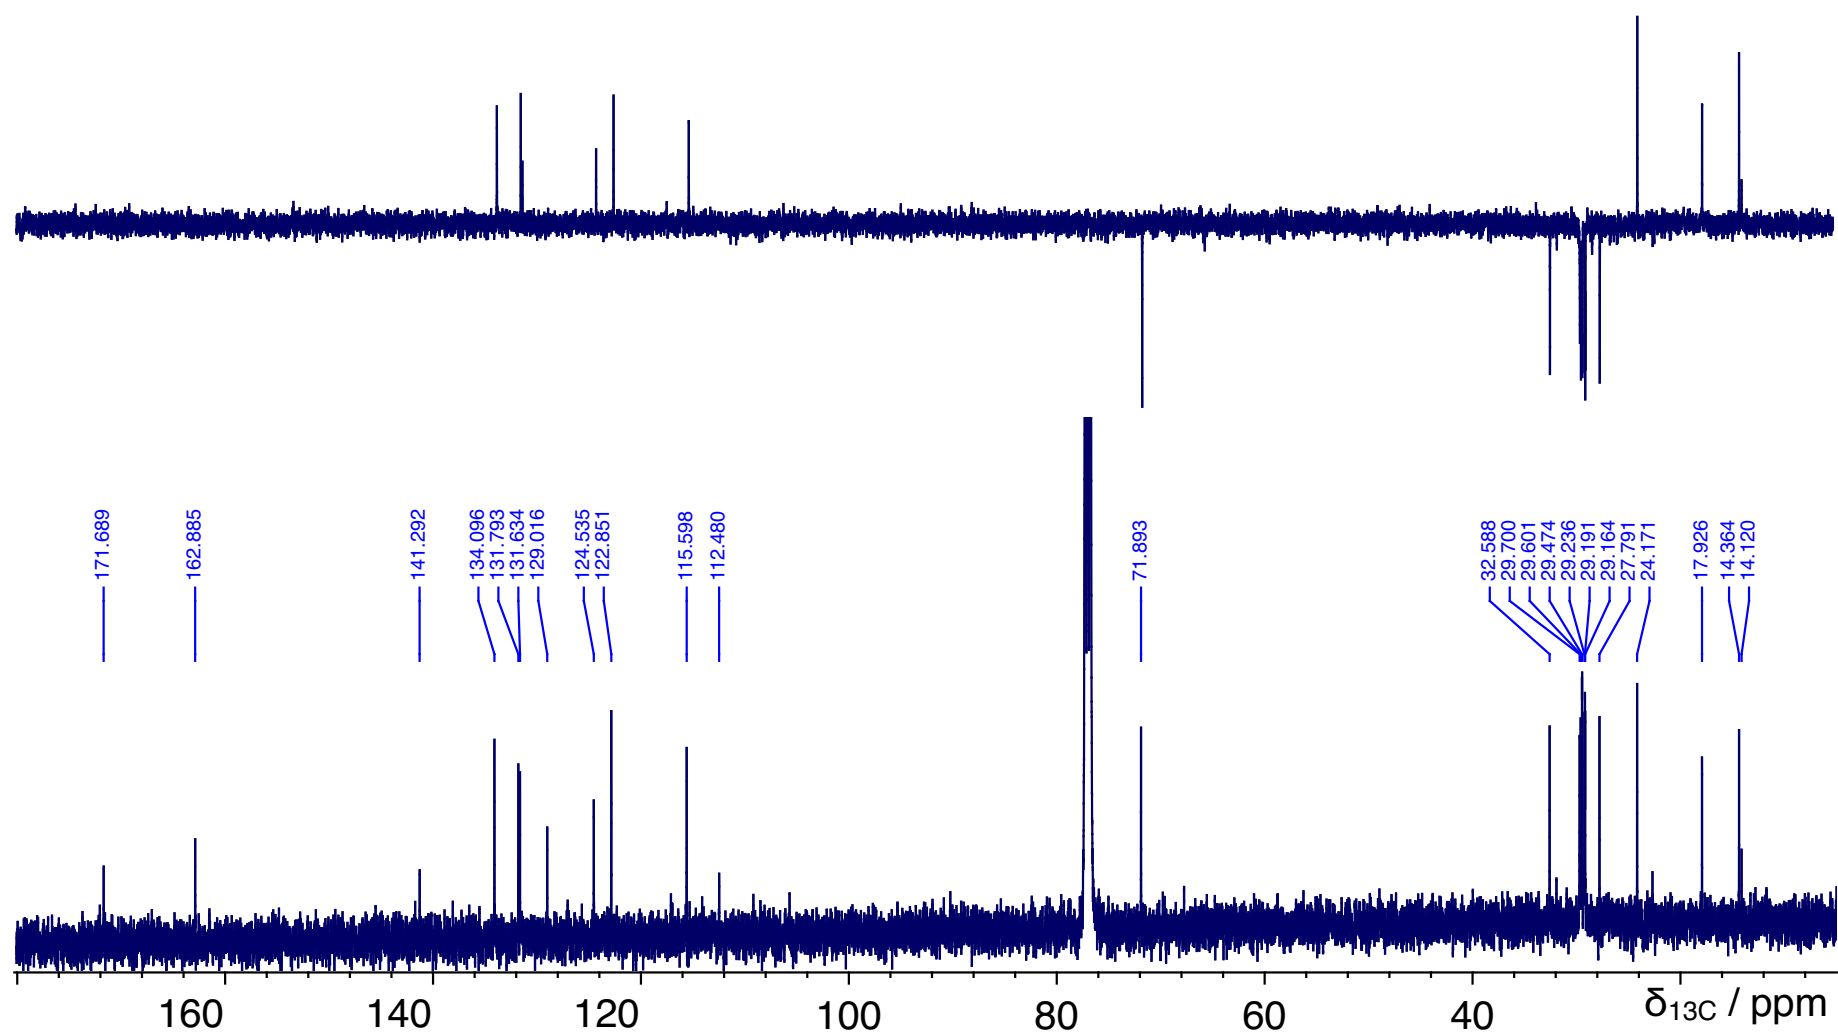

Figure S13.  $^{13}\text{C}$  NMR and DEPT spectra (CDCl<sub>3</sub>, 150 MHz)

S14

for **3**.

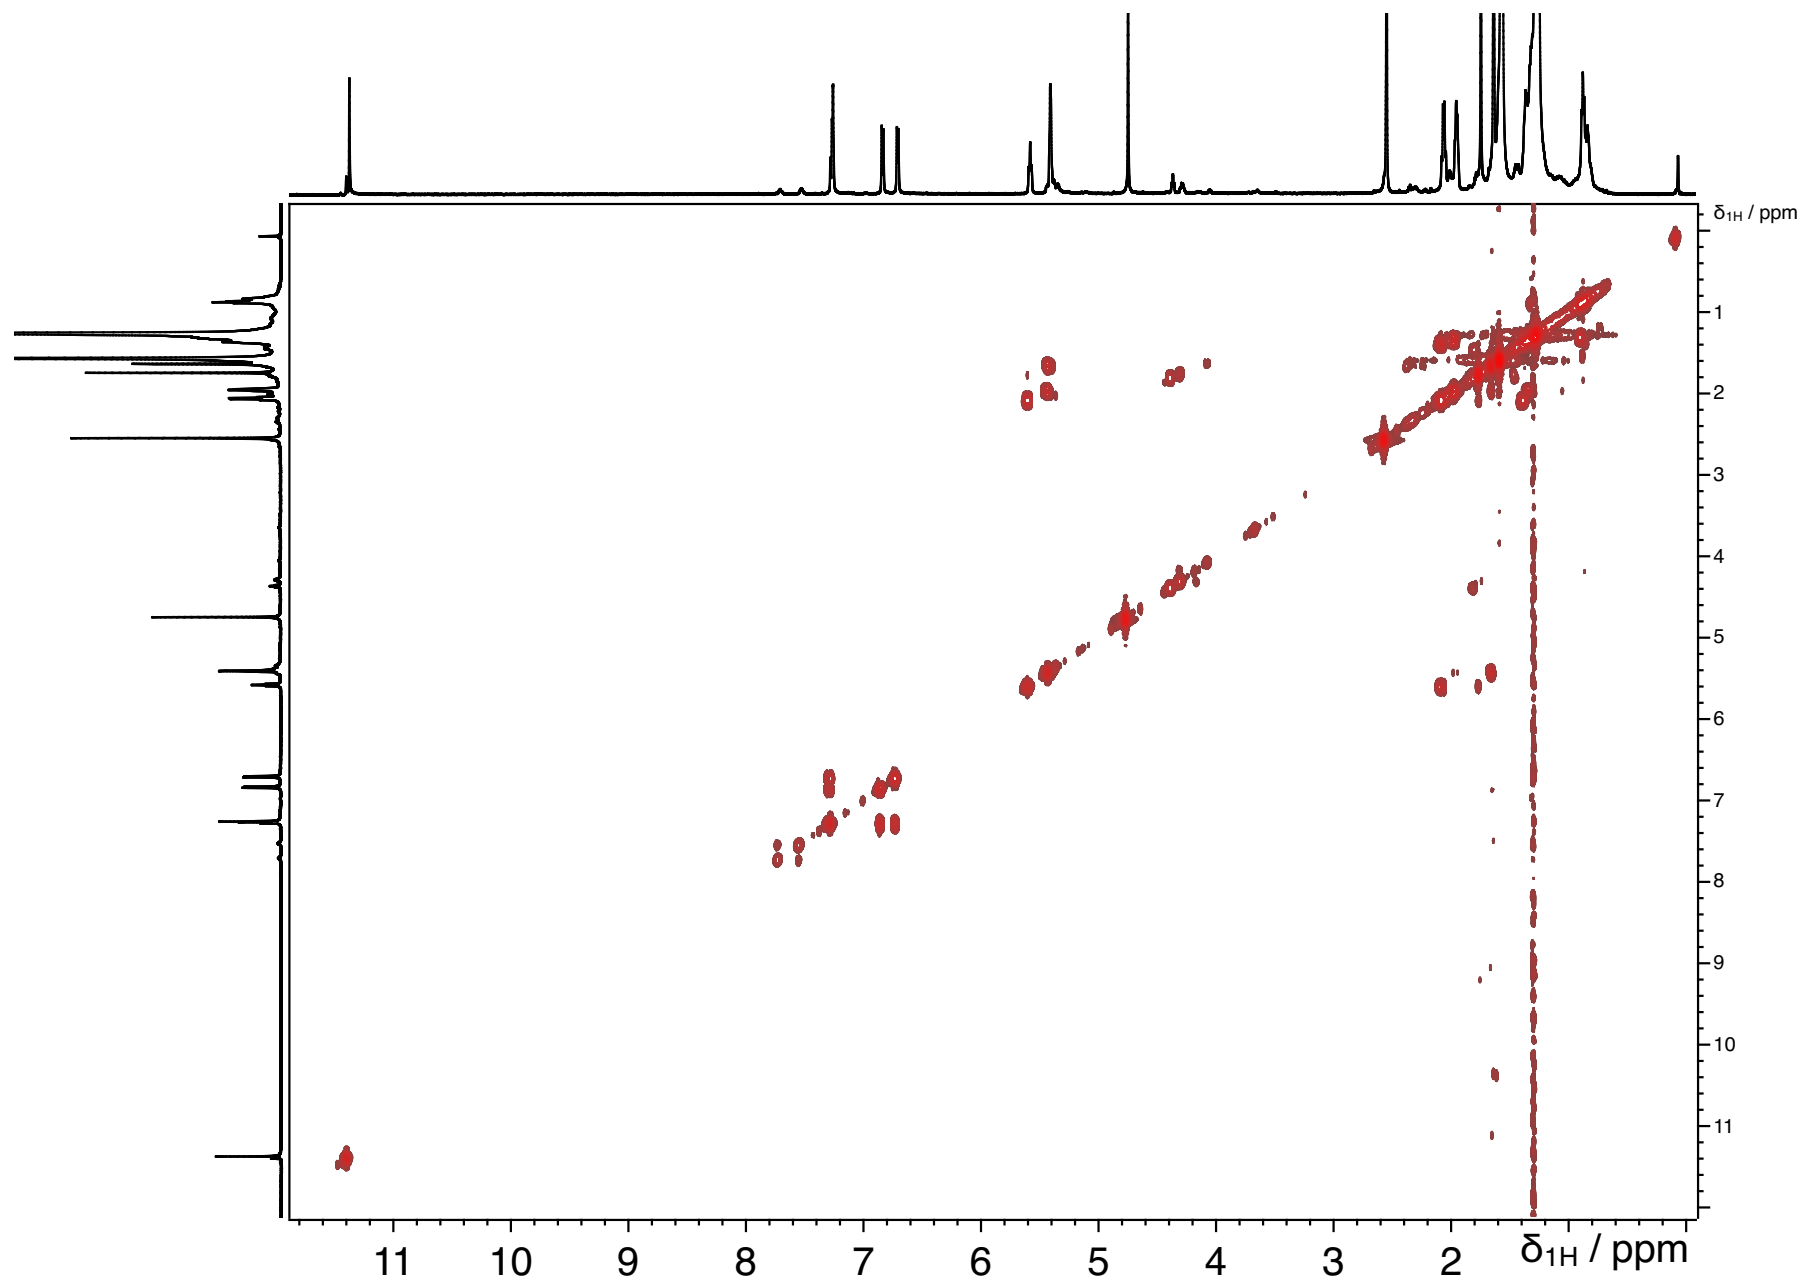

Figure S14. DQF-COSY spectrum (CDCl<sub>3</sub>, 600 MHz) for **3**

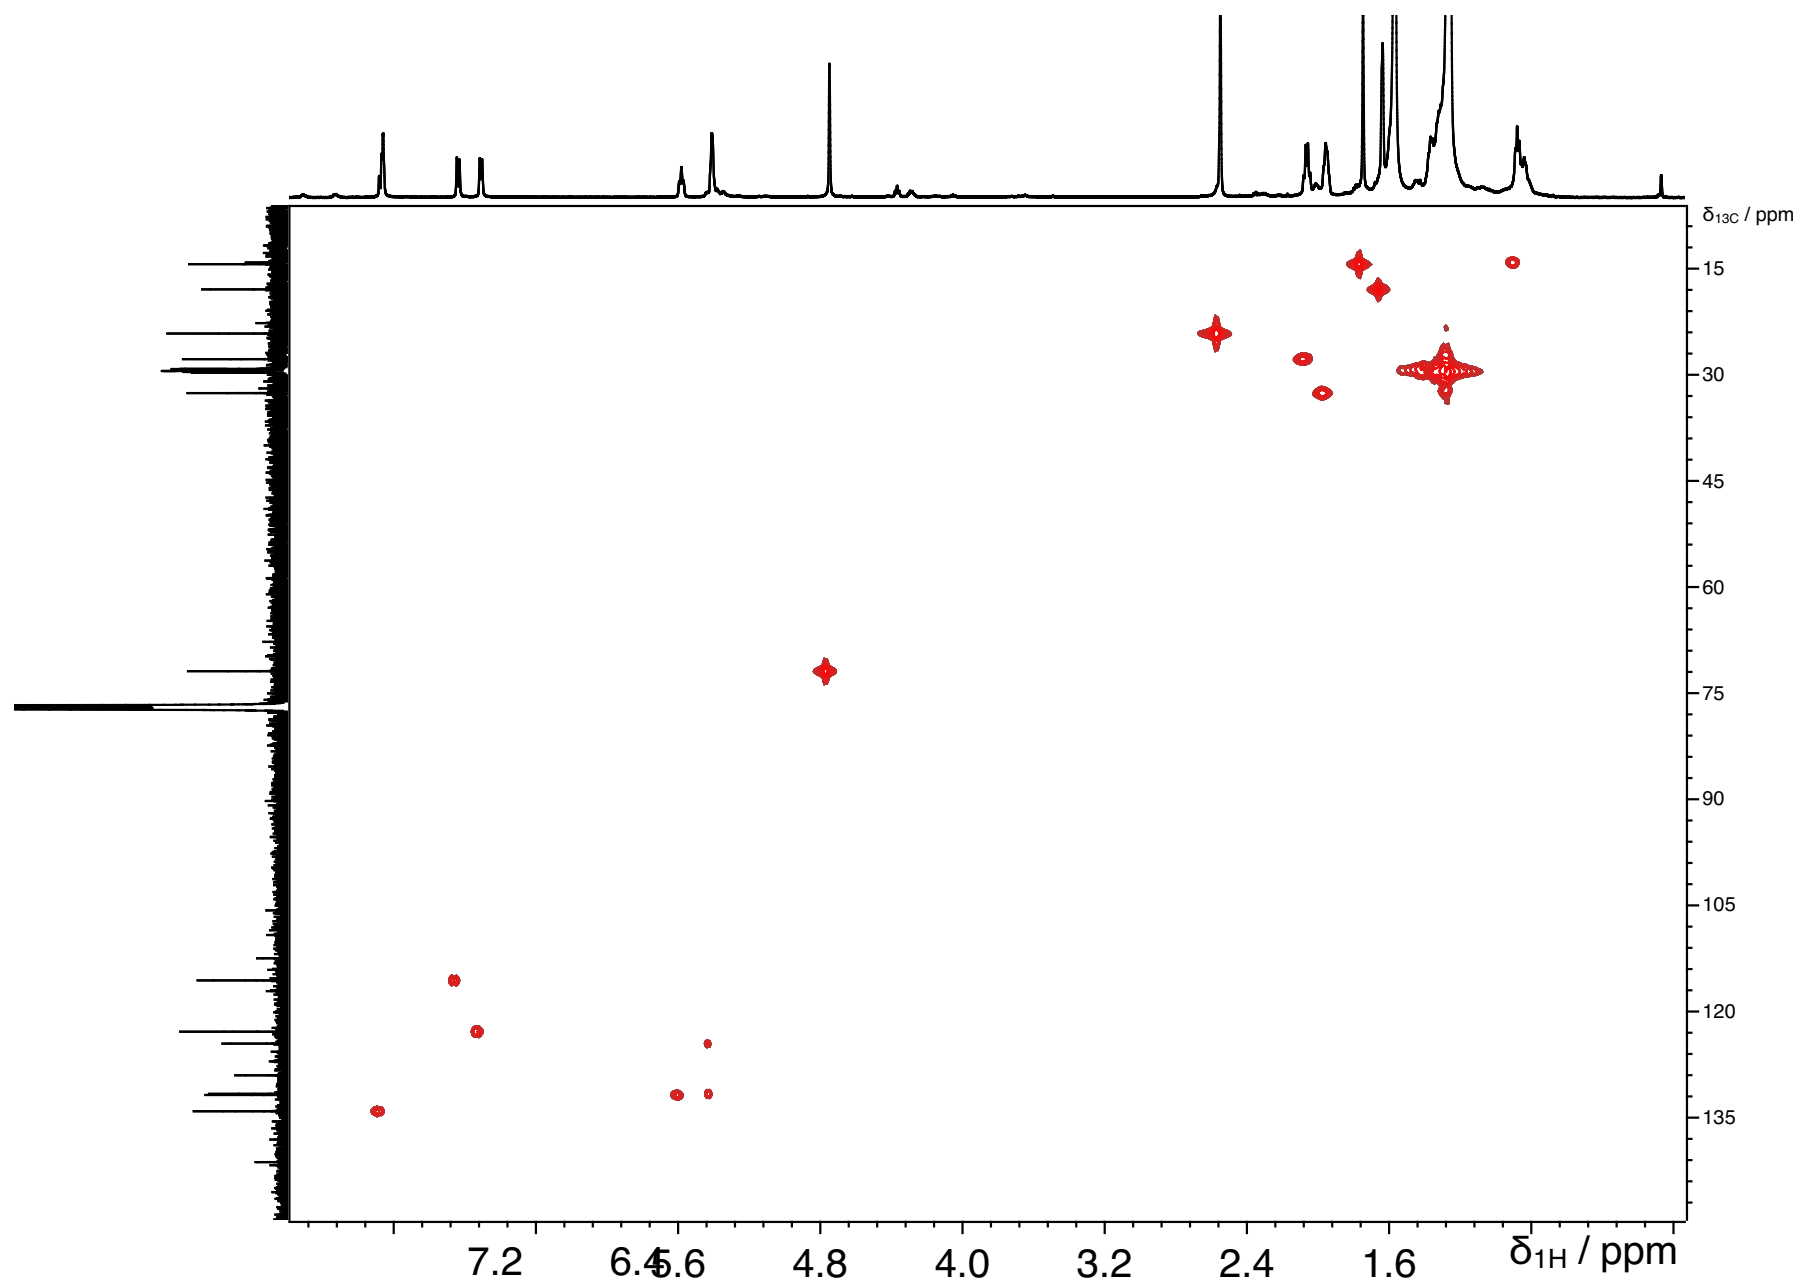

Figure S15. HMQC spectrum (CDCl<sub>3</sub>, 600 MHz)

S16

for **3**.

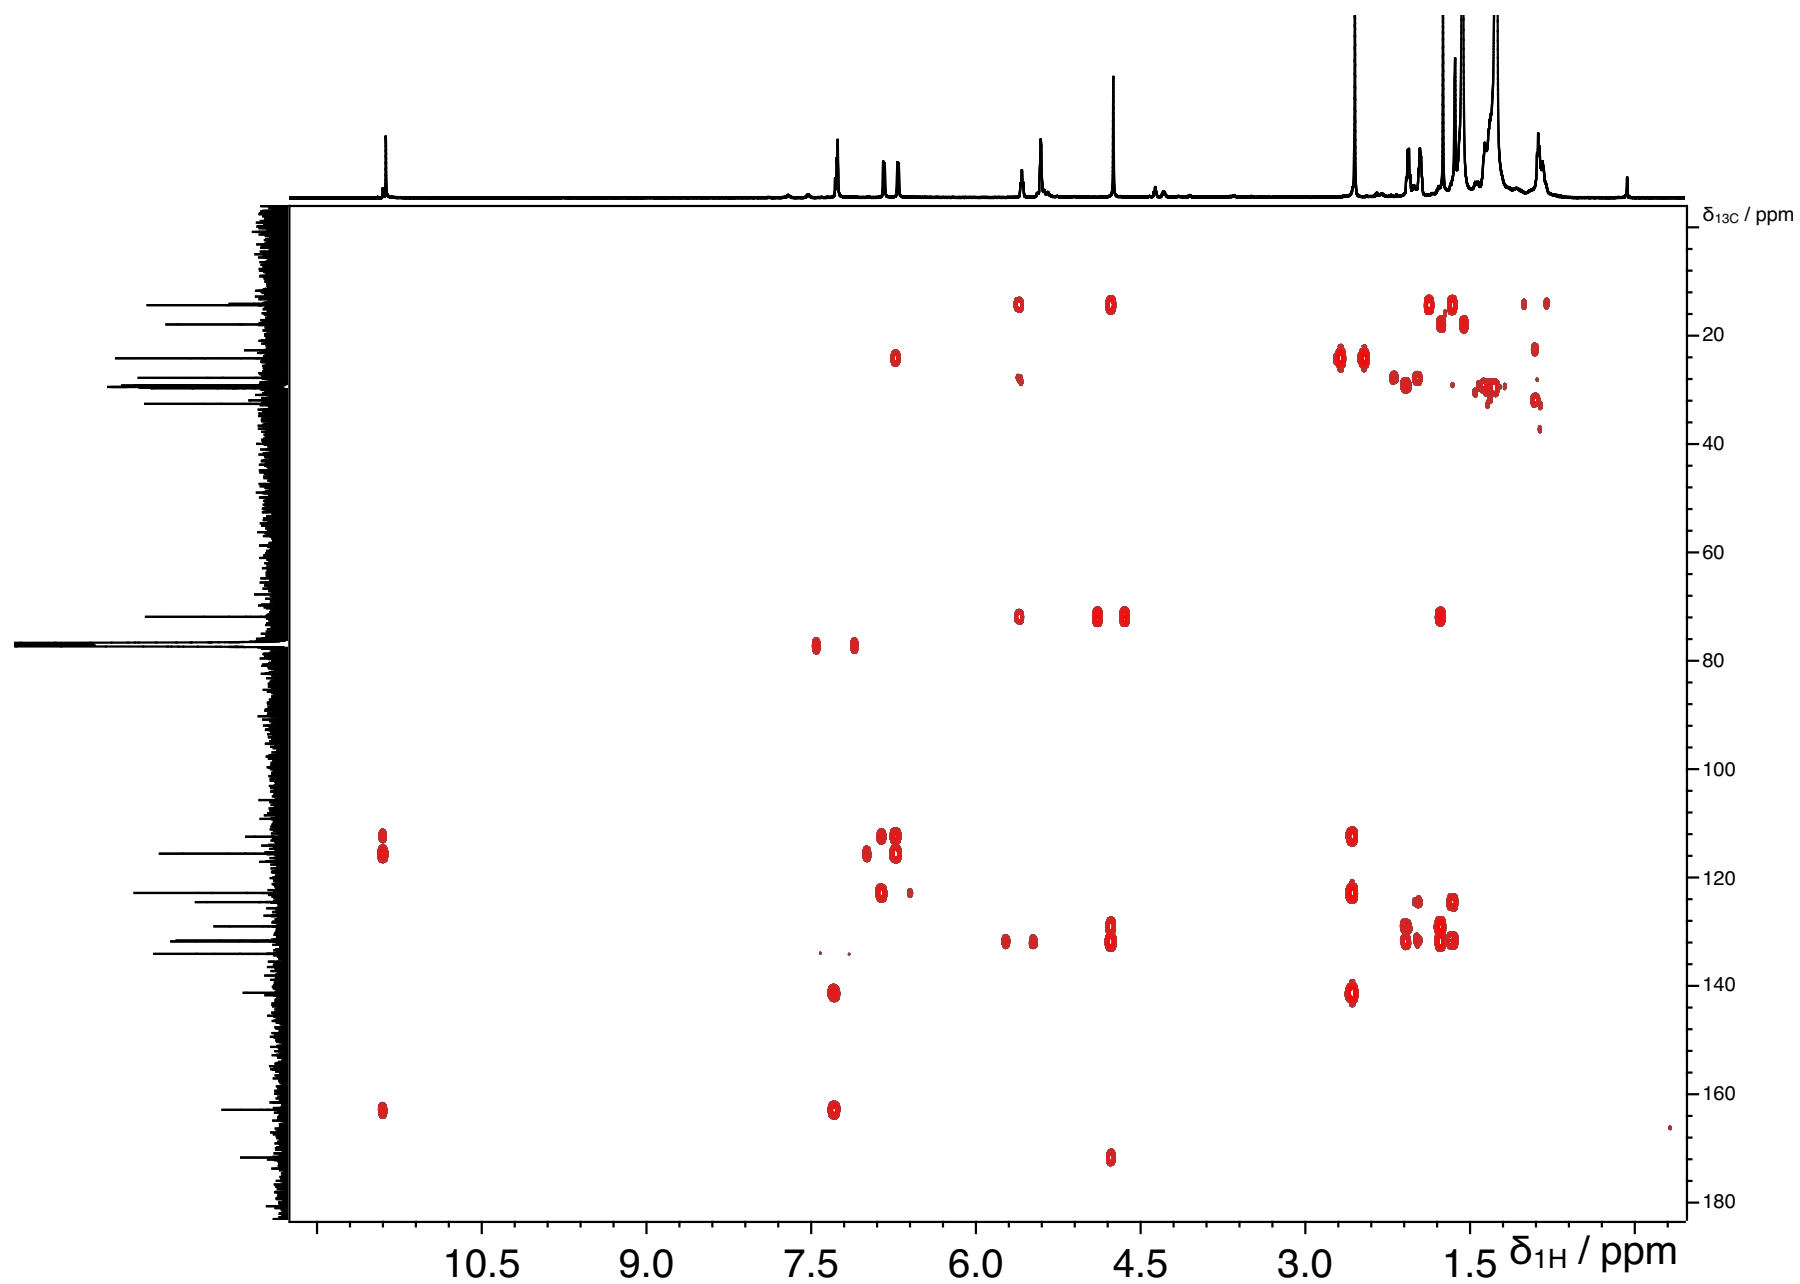

Figure S16. HMBC spectrum ( $\text{CDCl}_3$ , 600 MHz) for **3**.

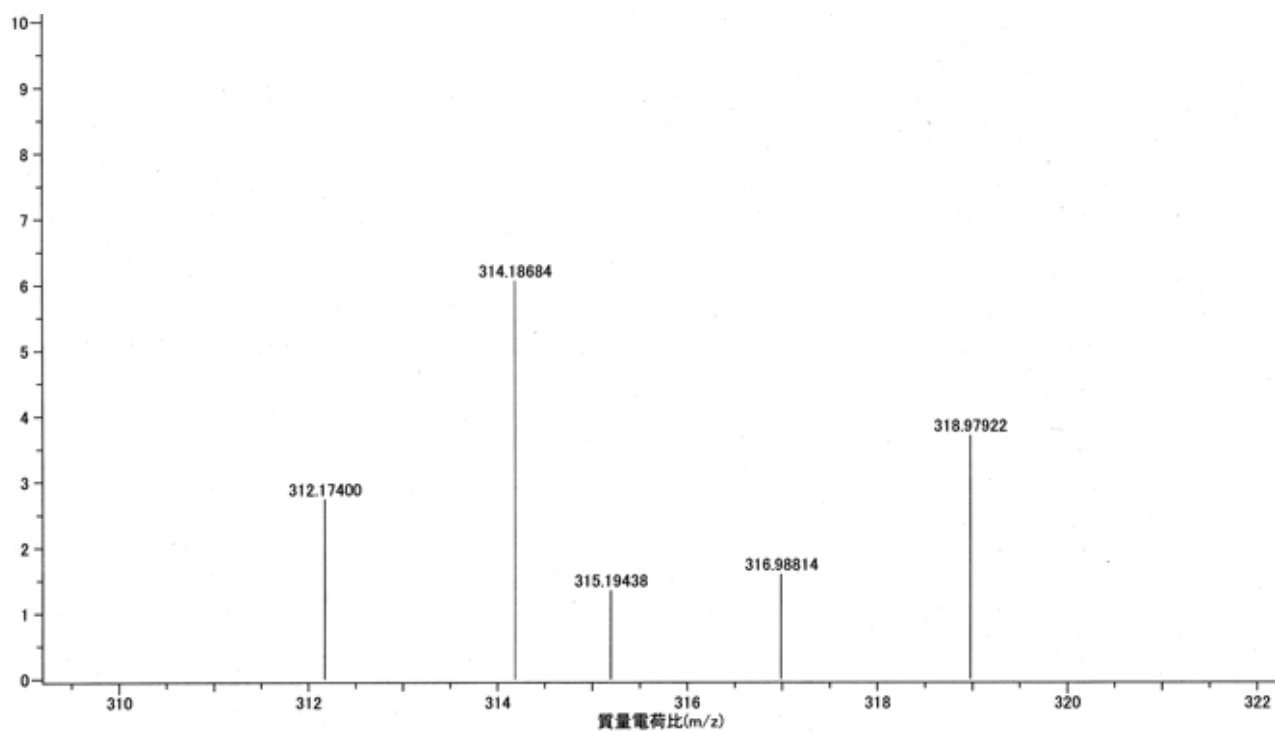

Figure S17. HRMS spectrum for **1**.

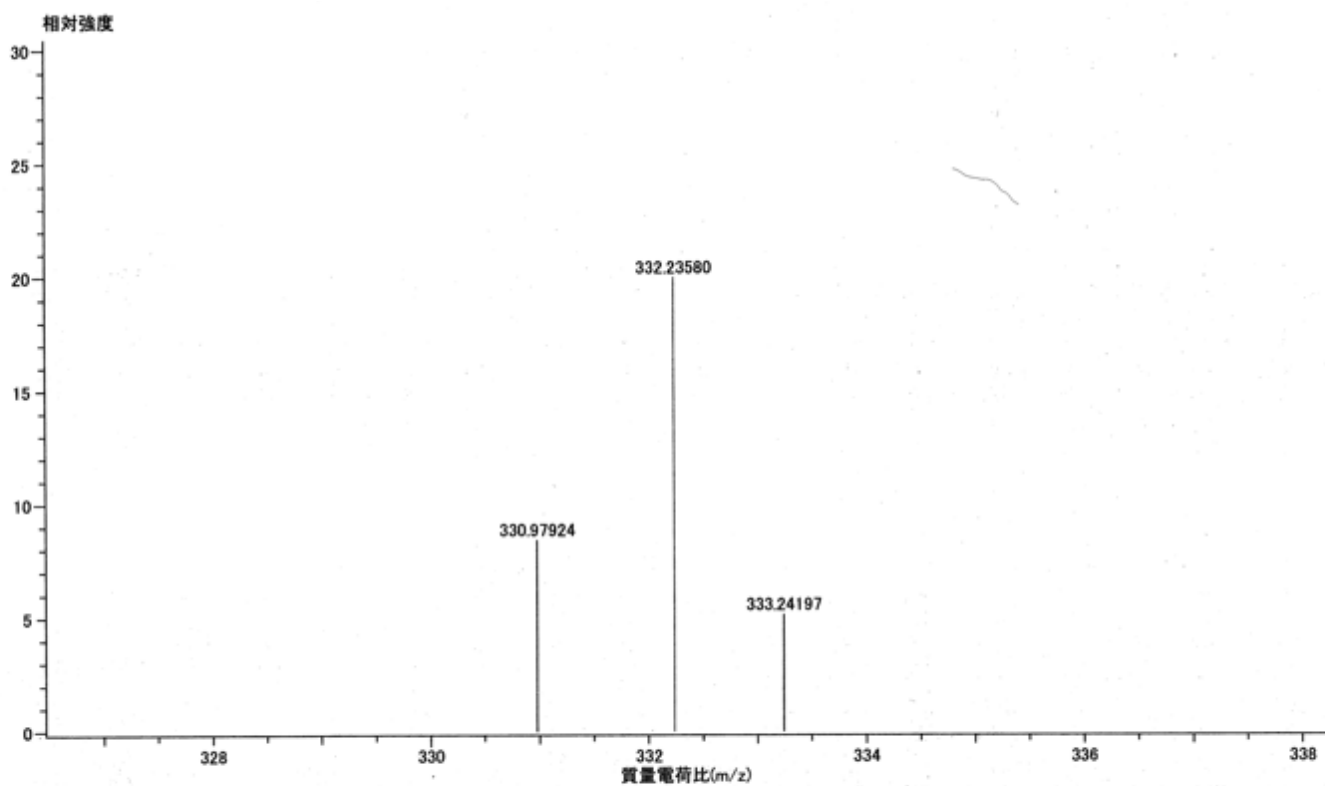

Figure S18. HRMS spectrum for **2**.

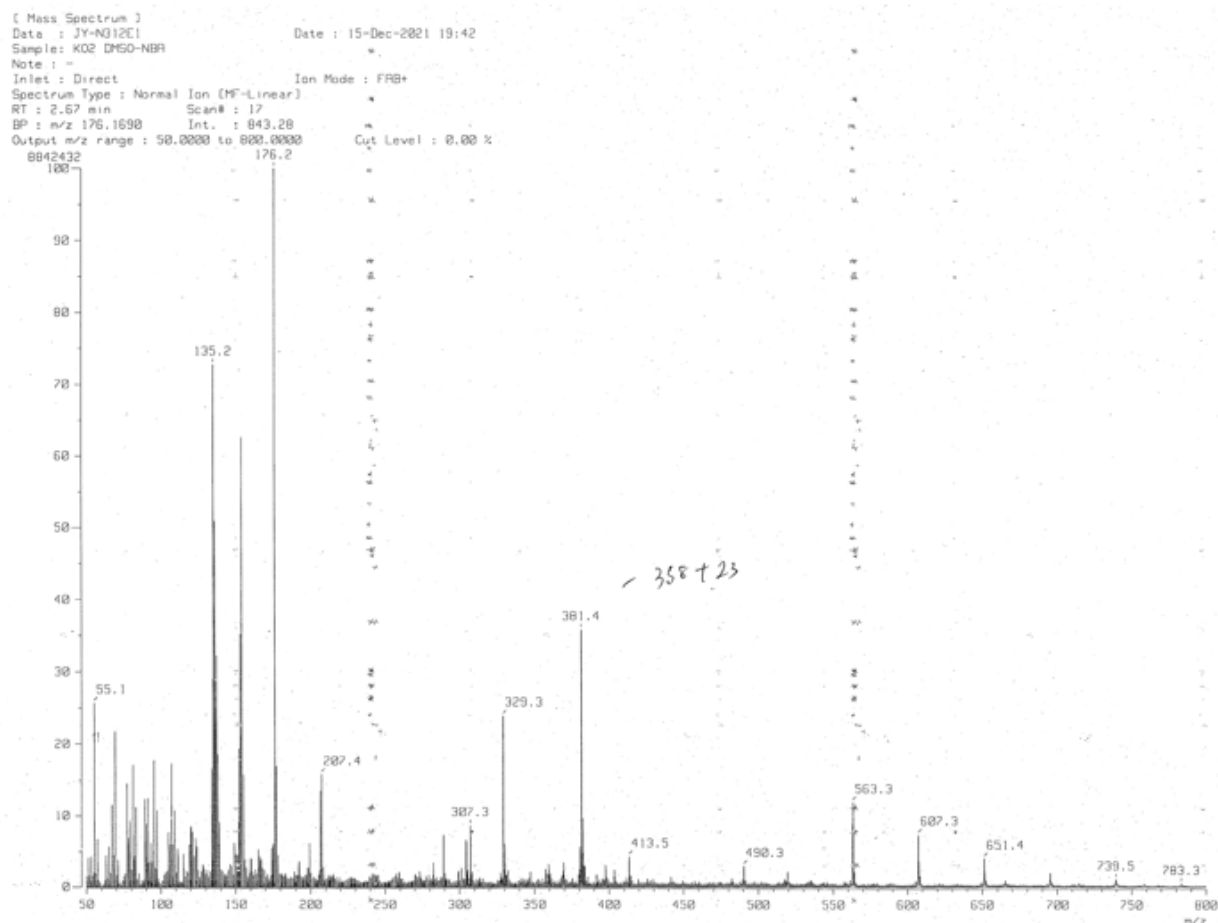

[ Elemental Composition ]

Date : J028

Date : 27-Dec-2021 21:22

Page: 1

Sample: N312-e1 DMSO-NBA

Note :

Inlet : Direct

Ion Mode : FAB+

RT : 2.34 min

Scan#: 15

Elements : C 30/15, 1H 45/25, O 5/0, Na 2/0

Mass Tolerance : 20mmu

Unsaturation (U.S.) : 0.0 - 100.0

| Observed m/z | Int%  | Err[ppm / mmu] | U.S. | Composition         |
|--------------|-------|----------------|------|---------------------|
| 381.2380     | 100.0 | +42.5 / +16.2  | 14.5 | C 28 1H 29 O        |
|              |       | -12.9 / -4.9   | 9.5  | C 25 1H 33 O 3      |
|              |       | -46.6 / -17.8  | 10.5 | C 27 1H 34 Na       |
|              |       | +48.8 / +18.6  | 11.5 | C 26 1H 30 O Na     |
|              |       | -6.6 / -2.5    | 6.5  | C 23 1H 34 O 3 Na   |
|              |       | -40.3 / -15.4  | 7.5  | C 25 1H 35 Na 2     |
|              |       | -0.3 / -0.1    | 3.5  | C 21 1H 35 O 3 Na 2 |

Figure S19. HRMS spectrum for **3**.

## Reference

1. Choukchou-Braham, N.; Asakawa, Y.; Lepoittevin, J. Isolation, Structure Determination and Synthesis of New Dihydroiso-coumarins from Ginko biloba L. *Tetrahedron Lett.* **1994**, *35*, 3949–3952.
2. Li, W.; Wiesenfeldt, M.P.; Glorius, F. Ruthenium-NHC-Diamine Catalyzed Enantioselective Hydrogenation of Isocoumarins. *J. Am. Chem. Soc.* **2017**, *139*, 2585–2588.
